# Supplementary material for: Neural basis of adolescent THC-induced potentiation of opioid responses later in life
Source: Neuropsychopharmacology. 2024 Dec 10;50(5):818–27. doi: 10.1038/s41386-024-02033-8 (PMC11914220; doi:10.1038/s41386-024-02033-8)
Supplement: Supplementary file 2 — Supplemental Table 1 [file 41386_2024_2033_MOESM2_ESM.xlsx]

## Sheet: Sheet1
Figure 1
		t	df		pvalue
C	vehicle, saline	0.3108	10		0.76	paired t-test
	vehicle, morphine	2.352	11		0.038	paired t-test
	THC, morphine	3.14	31		0.0037	paired t-test
D		F	dfn	dfd	p
vehicle, saline vs. vehicle, morphine	Interaction	5.109	6	202	<0.0001	Two-way ANOVA
	Condition	57.48	1	202	<0.0001
	Test day	8.623	6	202	<0.0001
vehicle, saline vs. THC, morphine	Interaction	1.595	6	317	0.15	Two-way ANOVA
	Condition	12.33	1	317	0.0005
	Test day	3.657	6	317	0.0016
vehicle, morphine vs THC, morphine	Interaction	3.017	6	275	0.0071	Two-way ANOVA
	Condition	6.776	1	62	0.0115
	Test day	21.96	3.478	159.4	<0.0001
E		F	dfn	dfd	pvalue
	all	3.838	2	59	0.027	One-way ANOVA
		q	df		pvalue
	vehicle, saline vs. vehicle, morphine	3.701	59		0.03	Tukey's multiple comparisons test
	vehicle, saline vs. THC, morphine	3.131	59		0.8	Tukey's multiple comparisons test
	vehicle, morphine vs THC, morphine	1.397	59		0.59	Tukey's multiple comparisons test
F		F	dfn	dfd	pvalue
	all	0.46	2	59	0.63	One-way ANOVA
		q	df		pvalue
	vehicle, saline vs. vehicle, morphine	0.8148	59		0.83	Tukey's multiple comparisons test
	vehicle, saline vs. THC, morphine	1.358	59		0.6	Tukey's multiple comparisons test
	vehicle, morphine vs THC, morphine	0.3093	59		0.97	Tukey's multiple comparisons test
G		F	dfn	dfd	pvalue
	all	9.026	2	59	0.0004	One-way ANOVA
		q	df		pvalue
	vehicle, saline vs. vehicle, morphine	3.616	59		0.035	Tukey's multiple comparisons test
	vehicle, saline vs. THC, morphine	1.966	59		0.35	Tukey's multiple comparisons test
	vehicle, morphine vs THC, morphine	6	59		0.0002	Tukey's multiple comparisons test
H		F	dfn	dfd	pvalue
	all	8.931	2	42	0.0006	One-way ANOVA
		q	df		pvalue
	vehicle, saline vs. vehicle, morphine	4.741	42		0.0048	Tukey's multiple comparisons test
	vehicle, saline vs. THC, morphine	0.8327	42		0.83	Tukey's multiple comparisons test
	vehicle, morphine vs THC, morphine	5.709	42		0.0006	Tukey's multiple comparisons test
I		t	df		pvalue
	vehicle, morphine vs THC, morphine	0.08606	44		0.93	unpaired t-test
J		F	dfn	dfd	pvalue
	all	6.55	2	44	0.0032	One-way ANOVA
		q	df		pvalue
		5.016	44		0.0027	Tukey's multiple comparisons test
		3.408	44		0.052	Tukey's multiple comparisons test
		2.132	44		0.3	Tukey's multiple comparisons test
Figure 2
		t	df		pvalue
B	Vehicle, morphine	1.039	9		0.33	paired t-test
	THC, morphine	3.212	7		0.015	paired t-test
Figure 3
		t	df		pvalue
D	Vehicle, morphine vs. THC/morphine	3.079	24		0.0051	unpaired t-test
		F	df		pvalue
	all	6.638			0.0002	One-way ANOVA
H		q	df		pvalue
	Purple vs. blue	1.395	254		0.76	Tukey's multiple comparisons test
	Purple vs. red	1.227	254		0.82	Tukey's multiple comparisons test
	Purple vs. Yellow	5.054	254		0.0024	Tukey's multiple comparisons test
	Blue vs. red	2.445	254		0.31	Tukey's multiple comparisons test
	Blue vs. yellow	6.058	254		0.0002	Tukey's multiple comparisons test
	Red vs. yellow	3.613	254		0.05	Tukey's multiple comparisons test
Figure 4
D		F	dfn	dfd	pvalue
	Interaction	2.058	21	176	0.0062	Two-way ANO VA
	Group (THC vs. vehicle)	4.04e-05	1	176	0.99
	Brain region	14.03	21	176	<0.0001
		t	df		pvalue
	EP	0.3949	176		>0.9999	Tukey's multiple comparisons test
	Ant. Ctx.	3.264	176		0.0286	Tukey's multiple comparisons test
	DCN	0.5649	176		>0.9999	Tukey's multiple comparisons test
	LDT	0.4207	176		>0.9999	Tukey's multiple comparisons test
	PBN	2.299	176		0.3962	Tukey's multiple comparisons test
	BNST	0.6703	176		>0.9999	Tukey's multiple comparisons test
	CeA	0.7428	176		>0.9999	Tukey's multiple comparisons test
	DR	2.179	176		0.4963	Tukey's multiple comparisons test
	LH	0.9098	176		>0.9999	Tukey's multiple comparisons test
	GPe	0.363	176		>0.9999	Tukey's multiple comparisons test
	ZI	0.331	176		>0.9999	Tukey's multiple comparisons test
	DStr	0.1889	176		>0.9999	Tukey's multiple comparisons test
	PVH	0.068	176		>0.9999	Tukey's multiple comparisons test
	NAcCore	1.221	176		0.9962	Tukey's multiple comparisons test
	EAM	0.7961	176		>0.9999	Tukey's multiple comparisons test
	PO	0.9449	176		>0.9999	Tukey's multiple comparisons test
	NAcLat	1.162	176		0.998	Tukey's multiple comparisons test
	LHb	1.159	176		0.9981	Tukey's multiple comparisons test
	NAcMed	1.598	176		0.9263	Tukey's multiple comparisons test
	VP	3.043	176		0.0578	Tukey's multiple comparisons test
	MHb	1.355	176		0.9863	Tukey's multiple comparisons test
	Septum	0.6323	176		>0.9999	Tukey's multiple comparisons test
Figure 5
F		t	df		pvalue
	control PC1 vs THC PC1	6.559	8		0.0002	unpaired t-test
G		t	df		pvalue
	control PC2 vs THC PC2	0.1407	8		0.89	unpaired t-test
H		t	df		pvalue
	control PC3 vs THC PC3	0.7424	8		0.48	unpaired t-test
Figures S1, S2
D		F	dfn	dfd	pvalue
	Interaction	4.493	276	6648	<0.0001	Two-way ANO VA
	Group (THC vs. vehicle)	305.5	1	6648	<0.0001
	Brain region	49.2	276	6648	<0.0001
		t	df		pvalue
	Nucleus of the trapezoid body	0.5174	6648		>0.9999	Tukey's multiple comparisons test
	Subthalamic nucleus	0.7679	6648		>0.9999	Tukey's multiple comparisons test
	Bed nucleus of the anterior commissure	0.007852	6648		>0.9999	Tukey's multiple comparisons test
	Gracile nucleus	0.1252	6648		>0.9999	Tukey's multiple comparisons test
	Parasolitary nucleus	0.03225	6648		>0.9999	Tukey's multiple comparisons test
	Magnocellular nucleus	0.4961	6648		>0.9999	Tukey's multiple comparisons test
	Lateral terminal nucleus of the accessory optic tract	0.01956	6648		>0.9999	Tukey's multiple comparisons test
	Nucleus of the lateral lemniscus	2.063	6648		>0.9999	Tukey's multiple comparisons test
	Anterodorsal nucleus	0.3213	6648		>0.9999	Tukey's multiple comparisons test
	Main olfactory bulb	7.89	6648		<0.0001	Tukey's multiple comparisons test
	Ventral cochlear nucleus	3.839	6648		0.0339	Tukey's multiple comparisons test
	Rhomboid nucleus	0.1436	6648		>0.9999	Tukey's multiple comparisons test
	Cuneate nucleus	0.749	6648		>0.9999	Tukey's multiple comparisons test
	Substantia nigra, reticular part	2.565	6648		0.944	Tukey's multiple comparisons test
	Parasubthalamic nucleus	0.1273	6648		>0.9999	Tukey's multiple comparisons test
	Submedial nucleus of the thalamus	0.3443	6648		>0.9999	Tukey's multiple comparisons test
	Ventral medial nucleus of the thalamus	2.486	6648		0.973	Tukey's multiple comparisons test
	Anterior amygdalar area	0.5777	6648		>0.9999	Tukey's multiple comparisons test
	Globus pallidus, external segment	3.294	6648		0.2407	Tukey's multiple comparisons test
	Substantia innominata	1.998	6648		>0.9999	Tukey's multiple comparisons test
	Superior olivary complex	0.4082	6648		>0.9999	Tukey's multiple comparisons test
	Anterior olfactory nucleus	4.188	6648		0.0079	Tukey's multiple comparisons test
	Piriform area	15.67	6648		<0.0001	Tukey's multiple comparisons test
	Principal sensory nucleus of the trigeminal	2.517	6648		0.9634	Tukey's multiple comparisons test
	Spinal nucleus of the trigeminal, caudal part	2.406	6648		0.989	Tukey's multiple comparisons test
	Central medial nucleus of the thalamus	0.2871	6648		>0.9999	Tukey's multiple comparisons test
	Anterior group of the dorsal thalamus	0.4764	6648		>0.9999	Tukey's multiple comparisons test
	Accessory olfactory bulb	0.3024	6648		>0.9999	Tukey's multiple comparisons test
	Flocculus	2.139	6648		0.9999	Tukey's multiple comparisons test
	Medulla, sensory related	3.329	6648		0.2159	Tukey's multiple comparisons test
	Paraflocculus	2.759	6648		0.801	Tukey's multiple comparisons test
	Ventral anterior-lateral complex of the thalamus	2.53	6648		0.9586	Tukey's multiple comparisons test
	Substantia nigra, compact part	0.2683	6648		>0.9999	Tukey's multiple comparisons test
	Parataenial nucleus	0.4735	6648		>0.9999	Tukey's multiple comparisons test
	Medullary reticular nucleus	1.328	6648		>0.9999	Tukey's multiple comparisons test
	Orbital area, lateral part	1.666	6648		>0.9999	Tukey's multiple comparisons test
	Dorsal cochlear nucleus	1.179	6648		>0.9999	Tukey's multiple comparisons test
	Nucleus of reuniens	0.4766	6648		>0.9999	Tukey's multiple comparisons test
	Lateral reticular nucleus	1.161	6648		>0.9999	Tukey's multiple comparisons test
	Suprageniculate nucleus	0.02576	6648		>0.9999	Tukey's multiple comparisons test
	Nucleus x	0.1449	6648		>0.9999	Tukey's multiple comparisons test
	Taenia tecta	1.294	6648		>0.9999	Tukey's multiple comparisons test
	Frontal pole, cerebral cortex	0.5759	6648		>0.9999	Tukey's multiple comparisons test
	Interanteromedial nucleus of the thalamus	0.05532	6648		>0.9999	Tukey's multiple comparisons test
	Agranular insular area, posterior part	1.481	6648		>0.9999	Tukey's multiple comparisons test
	External cuneate nucleus	0.3014	6648		>0.9999	Tukey's multiple comparisons test
	Primary somatosensory area, nose	2.521	6648		0.962	Tukey's multiple comparisons test
	Paraventricular nucleus of the thalamus	0.8409	6648		>0.9999	Tukey's multiple comparisons test
	Olfactory areas	3.696	6648		0.0593	Tukey's multiple comparisons test
	Facial motor nucleus	0.7022	6648		>0.9999	Tukey's multiple comparisons test
	Reticular nucleus of the thalamus	1.385	6648		>0.9999	Tukey's multiple comparisons test
	Nucleus of the solitary tract	0.761	6648		>0.9999	Tukey's multiple comparisons test
	Posterolateral visual area	0.843	6648		>0.9999	Tukey's multiple comparisons test
	Pallidum	1.22	6648		>0.9999	Tukey's multiple comparisons test
	Paracentral nucleus	0.5829	6648		>0.9999	Tukey's multiple comparisons test
	Induseum griseum	0.01151	6648		>0.9999	Tukey's multiple comparisons test
	Entorhinal area, lateral part	9.221	6648		<0.0001	Tukey's multiple comparisons test
	Perihypoglossal nuclei	0.2272	6648		>0.9999	Tukey's multiple comparisons test
	Endopiriform nucleus	3.145	6648		0.3703	Tukey's multiple comparisons test
	Globus pallidus, internal segment	0.4263	6648		>0.9999	Tukey's multiple comparisons test
	Anteroventral nucleus of thalamus	0.251	6648		>0.9999	Tukey's multiple comparisons test
	Bed nuclei of the stria terminalis	1.241	6648		>0.9999	Tukey's multiple comparisons test
	Fundus of striatum	0.1634	6648		>0.9999	Tukey's multiple comparisons test
	Orbital area, ventrolateral part	1.116	6648		>0.9999	Tukey's multiple comparisons test
	Pontine reticular nucleus	2.485	6648		0.9733	Tukey's multiple comparisons test
	Parvicellular reticular nucleus	2.251	6648		0.9989	Tukey's multiple comparisons test
	Folium-tuber vermis (VII)	0.1403	6648		>0.9999	Tukey's multiple comparisons test
	Abducens nucleus	0.01151	6648		>0.9999	Tukey's multiple comparisons test
	Medulla	9.155	6648		<0.0001	Tukey's multiple comparisons test
	Nucleus ambiguus	0.03682	6648		>0.9999	Tukey's multiple comparisons test
	Intermediate reticular nucleus	2.217	6648		0.9994	Tukey's multiple comparisons test
	Inferior salivatory nucleus	0.01671	6648		>0.9999	Tukey's multiple comparisons test
	Retrosplenial area, dorsal part	3.102	6648		0.4142	Tukey's multiple comparisons test
	Primary somatosensory area, upper limb	3.279	6648		0.2516	Tukey's multiple comparisons test
	Primary visual area	20.73	6648		<0.0001	Tukey's multiple comparisons test
	Lateral visual area	3.134	6648		0.3813	Tukey's multiple comparisons test
	Primary motor area	9.023	6648		<0.0001	Tukey's multiple comparisons test
	Area postrema	0.04459	6648		>0.9999	Tukey's multiple comparisons test
	Nucleus accumbens	1.807	6648		>0.9999	Tukey's multiple comparisons test
	Ventral tegmental nucleus	0.02887	6648		>0.9999	Tukey's multiple comparisons test
	Midbrain reticular nucleus, retrorubral area	0.4696	6648		>0.9999	Tukey's multiple comparisons test
	Pons	6.139	6648		<0.0001	Tukey's multiple comparisons test
	Ventral posterior complex of the thalamus	5.231	6648		<0.0001	Tukey's multiple comparisons test
	Paraventricular hypothalamic nucleus	0.3423	6648		>0.9999	Tukey's multiple comparisons test
	Interfascicular nucleus raphe	0.04131	6648		>0.9999	Tukey's multiple comparisons test
	Perireunensis nucleus	0.01308	6648		>0.9999	Tukey's multiple comparisons test
	Retrosplenial area, lateral agranular part	0.9642	6648		>0.9999	Tukey's multiple comparisons test
	Hypoglossal nucleus	0.3017	6648		>0.9999	Tukey's multiple comparisons test
	Infralimbic area	0.8704	6648		>0.9999	Tukey's multiple comparisons test
	Intercalated amygdalar nucleus	0.1539	6648		>0.9999	Tukey's multiple comparisons test
	Primary somatosensory area, barrel field	5.921	6648		<0.0001	Tukey's multiple comparisons test
	Uvula (IX)	1.043	6648		>0.9999	Tukey's multiple comparisons test
	Field CA2	0.9856	6648		>0.9999	Tukey's multiple comparisons test
	Postsubiculum	0.5136	6648		>0.9999	Tukey's multiple comparisons test
	Vestibular nuclei	3.599	6648		0.0852	Tukey's multiple comparisons test
	Posterior auditory area	0.2164	6648		>0.9999	Tukey's multiple comparisons test
	Medulla, behavioral state related	0.05857	6648		>0.9999	Tukey's multiple comparisons test
	Dentate nucleus	0.542	6648		>0.9999	Tukey's multiple comparisons test
	Diagonal band nucleus	0.2983	6648		>0.9999	Tukey's multiple comparisons test
	Primary somatosensory area, mouth	2.439	6648		0.9836	Tukey's multiple comparisons test
	Somatosensory areas	4.877	6648		0.0003	Tukey's multiple comparisons test
	Pons, motor related	6.584	6648		<0.0001	Tukey's multiple comparisons test
	Ventral posterolateral nucleus of the thalamus	1.186	6648		>0.9999	Tukey's multiple comparisons test
	Ventral tegmental area	0.5028	6648		>0.9999	Tukey's multiple comparisons test
	Thalamus	4.588	6648		0.0013	Tukey's multiple comparisons test
	Subiculum	3.171	6648		0.3451	Tukey's multiple comparisons test
	Nucleus of the lateral olfactory tract	0.1363	6648		>0.9999	Tukey's multiple comparisons test
	Zona incerta	2.028	6648		>0.9999	Tukey's multiple comparisons test
	Dorsal part of the lateral geniculate complex	0.5742	6648		>0.9999	Tukey's multiple comparisons test
	Anteromedial visual area	0.6244	6648		>0.9999	Tukey's multiple comparisons test
	Red nucleus	1.289	6648		>0.9999	Tukey's multiple comparisons test
	Nucleus of the brachium of the inferior colliculus	0.0965	6648		>0.9999	Tukey's multiple comparisons test
	Gigantocellular reticular nucleus	1.071	6648		>0.9999	Tukey's multiple comparisons test
	Medial geniculate complex	0.2858	6648		>0.9999	Tukey's multiple comparisons test
	Secondary motor area	2.949	6648		0.5886	Tukey's multiple comparisons test
	Fields of Forel	0.08895	6648		>0.9999	Tukey's multiple comparisons test
	Striatum-like amygdalar nuclei	0.1377	6648		>0.9999	Tukey's multiple comparisons test
	Cortical subplate	1.612	6648		>0.9999	Tukey's multiple comparisons test
	Primary somatosensory area, lower limb	1.799	6648		>0.9999	Tukey's multiple comparisons test
	Isocortex	1.401	6648		>0.9999	Tukey's multiple comparisons test
	Hippocampal formation	1.246	6648		>0.9999	Tukey's multiple comparisons test
	Superior colliculus, sensory related	2.345	6648		0.9952	Tukey's multiple comparisons test
	Agranular insular area, ventral part	1.113	6648		>0.9999	Tukey's multiple comparisons test
	Retrosplenial area, ventral part	2.392	6648		0.9908	Tukey's multiple comparisons test
	Central amygdalar nucleus	1.367	6648		>0.9999	Tukey's multiple comparisons test
	Interposed nucleus	1.025	6648		>0.9999	Tukey's multiple comparisons test
	Dorsal motor nucleus of the vagus nerve	0.1151	6648		>0.9999	Tukey's multiple comparisons test
	Supramammillary nucleus	0.1398	6648		>0.9999	Tukey's multiple comparisons test
	Lateral dorsal nucleus of thalamus	0.4373	6648		>0.9999	Tukey's multiple comparisons test
	Superior central nucleus raphe	0.3411	6648		>0.9999	Tukey's multiple comparisons test
	Posterior amygdalar nucleus	0.1521	6648		>0.9999	Tukey's multiple comparisons test
	Basolateral amygdalar nucleus	1.024	6648		>0.9999	Tukey's multiple comparisons test
	Dorsal premammillary nucleus	0.03361	6648		>0.9999	Tukey's multiple comparisons test
	Nucleus of the posterior commissure	0.1215	6648		>0.9999	Tukey's multiple comparisons test
	Hypothalamus	2.284	6648		0.9981	Tukey's multiple comparisons test
	Pedunculopontine nucleus	0.423	6648		>0.9999	Tukey's multiple comparisons test
	Subgeniculate nucleus	0.02892	6648		>0.9999	Tukey's multiple comparisons test
	Entorhinal area, medial part, dorsal zone	1.566	6648		>0.9999	Tukey's multiple comparisons test
	Inferior colliculus	3.398	6648		0.1727	Tukey's multiple comparisons test
	Anterolateral visual area	1.16	6648		>0.9999	Tukey's multiple comparisons test
	Paragigantocellular reticular nucleus	0.4117	6648		>0.9999	Tukey's multiple comparisons test
	Nucleus incertus	0.08657	6648		>0.9999	Tukey's multiple comparisons test
	Linear nucleus of the medulla	0.02907	6648		>0.9999	Tukey's multiple comparisons test
	Precommissural nucleus	0.04231	6648		>0.9999	Tukey's multiple comparisons test
	Perirhinal area	1.218	6648		>0.9999	Tukey's multiple comparisons test
	Thalamus, sensory-motor cortex related	0.0135	6648		>0.9999	Tukey's multiple comparisons test
	Field CA3	2.314	6648		0.997	Tukey's multiple comparisons test
	Prelimbic area	0.5778	6648		>0.9999	Tukey's multiple comparisons test
	Lateral preoptic area	0.3878	6648		>0.9999	Tukey's multiple comparisons test
	Striatum	1.227	6648		>0.9999	Tukey's multiple comparisons test
	Magnocellular reticular nucleus	0.2144	6648		>0.9999	Tukey's multiple comparisons test
	Parastrial nucleus	0.0248	6648		>0.9999	Tukey's multiple comparisons test
	Arcuate hypothalamic nucleus	0.08131	6648		>0.9999	Tukey's multiple comparisons test
	Suprachiasmatic nucleus	0.03646	6648		>0.9999	Tukey's multiple comparisons test
	Medial amygdalar nucleus	0.6395	6648		>0.9999	Tukey's multiple comparisons test
	Dorsal peduncular area	0.08596	6648		>0.9999	Tukey's multiple comparisons test
	Presubiculum	0.6302	6648		>0.9999	Tukey's multiple comparisons test
	Posterior hypothalamic nucleus	0.6577	6648		>0.9999	Tukey's multiple comparisons test
	Central linear nucleus raphe	0.0348	6648		>0.9999	Tukey's multiple comparisons test
	Intergeniculate leaflet of the lateral geniculate complex	0.09453	6648		>0.9999	Tukey's multiple comparisons test
	Trochlear nucleus	0.002565	6648		>0.9999	Tukey's multiple comparisons test
	Posterior complex of the thalamus	0.5639	6648		>0.9999	Tukey's multiple comparisons test
	Superior colliculus, motor related	2.803	6648		0.7556	Tukey's multiple comparisons test
	Dorsal auditory area	2.657	6648		0.8888	Tukey's multiple comparisons test
	Subfornical organ	0.008551	6648		>0.9999	Tukey's multiple comparisons test
	Primary auditory area	2.022	6648		>0.9999	Tukey's multiple comparisons test
	Midbrain	2.831	6648		0.7259	Tukey's multiple comparisons test
	Tuberal nucleus	0.1423	6648		>0.9999	Tukey's multiple comparisons test
	Anterior tegmental nucleus	0.007416	6648		>0.9999	Tukey's multiple comparisons test
	Cortical amygdalar area	0.1473	6648		>0.9999	Tukey's multiple comparisons test
	Lateral hypothalamic area	1.452	6648		>0.9999	Tukey's multiple comparisons test
	Paramedian lobule	0.9857	6648		>0.9999	Tukey's multiple comparisons test
	Lateral posterior nucleus of the thalamus	0.2606	6648		>0.9999	Tukey's multiple comparisons test
	Primary somatosensory area, trunk	0.4524	6648		>0.9999	Tukey's multiple comparisons test
	Lateral amygdalar nucleus	0.2959	6648		>0.9999	Tukey's multiple comparisons test
	Paraventricular hypothalamic nucleus, descending division	0.05208	6648		>0.9999	Tukey's multiple comparisons test
	Dorsomedial nucleus of the hypothalamus	0.3083	6648		>0.9999	Tukey's multiple comparisons test
	Supplemental somatosensory area	1.506	6648		>0.9999	Tukey's multiple comparisons test
	Tuberomammillary nucleus	0.01208	6648		>0.9999	Tukey's multiple comparisons test
	Nucleus y	0.02292	6648		>0.9999	Tukey's multiple comparisons test
	Orbital area, medial part	0.2528	6648		>0.9999	Tukey's multiple comparisons test
	Agranular insular area	0.8509	6648		>0.9999	Tukey's multiple comparisons test
	Olfactory tubercle	0.3721	6648		>0.9999	Tukey's multiple comparisons test
	Sublaterodorsal nucleus	0.04492	6648		>0.9999	Tukey's multiple comparisons test
	Retrochiasmatic area	0.06043	6648		>0.9999	Tukey's multiple comparisons test
	Entorhinal area	0.05445	6648		>0.9999	Tukey's multiple comparisons test
	Septofimbrial nucleus	0.05754	6648		>0.9999	Tukey's multiple comparisons test
	Dorsal nucleus raphe	0.03556	6648		>0.9999	Tukey's multiple comparisons test
	Parafascicular nucleus	0.0494	6648		>0.9999	Tukey's multiple comparisons test
	Medial pretectal area	0.03934	6648		>0.9999	Tukey's multiple comparisons test
	Locus ceruleus	0.0231	6648		>0.9999	Tukey's multiple comparisons test
	Interpeduncular nucleus	0.113	6648		>0.9999	Tukey's multiple comparisons test
	Accessory facial motor nucleus	0.001166	6648		>0.9999	Tukey's multiple comparisons test
	Ventrolateral preoptic nucleus	0.008163	6648		>0.9999	Tukey's multiple comparisons test
	Ventral part of the lateral geniculate complex	0.4554	6648		>0.9999	Tukey's multiple comparisons test
	Preparasubthalamic nucleus	0.006266	6648		>0.9999	Tukey's multiple comparisons test
	Anterior cingulate area, dorsal part	0.7137	6648		>0.9999	Tukey's multiple comparisons test
	Interanterodorsal nucleus of the thalamus	0.02527	6648		>0.9999	Tukey's multiple comparisons test
	Oculomotor nucleus	0.008178	6648		>0.9999	Tukey's multiple comparisons test
	Pyramus (VIII)	0.09462	6648		>0.9999	Tukey's multiple comparisons test
	Anterior cingulate area, ventral part	0.6842	6648		>0.9999	Tukey's multiple comparisons test
	Subceruleus nucleus	0.01396	6648		>0.9999	Tukey's multiple comparisons test
	Periaqueductal gray	1.341	6648		>0.9999	Tukey's multiple comparisons test
	Bed nucleus of the accessory olfactory tract	0.02035	6648		>0.9999	Tukey's multiple comparisons test
	Nodulus (X)	0.3725	6648		>0.9999	Tukey's multiple comparisons test
	Copula pyramidis	0.411	6648		>0.9999	Tukey's multiple comparisons test
	Visceral area	0.463	6648		>0.9999	Tukey's multiple comparisons test
	Inferior olivary complex	0.03562	6648		>0.9999	Tukey's multiple comparisons test
	Mammillary body	0.08298	6648		>0.9999	Tukey's multiple comparisons test
	Parabrachial nucleus	0.3569	6648		>0.9999	Tukey's multiple comparisons test
	Periventricular hypothalamic nucleus, posterior part	0.03407	6648		>0.9999	Tukey's multiple comparisons test
	Supraoptic nucleus	0.01001	6648		>0.9999	Tukey's multiple comparisons test
	Laterodorsal tegmental nucleus	0.03557	6648		>0.9999	Tukey's multiple comparisons test
	Parasubiculum	0.304	6648		>0.9999	Tukey's multiple comparisons test
	Ectorhinal area	0.7917	6648		>0.9999	Tukey's multiple comparisons test
	Medial septal nucleus	0.1922	6648		>0.9999	Tukey's multiple comparisons test
	Fastigial nucleus	0.1624	6648		>0.9999	Tukey's multiple comparisons test
	Temporal association areas	0.9389	6648		>0.9999	Tukey's multiple comparisons test
	Midbrain reticular nucleus	1.428	6648		>0.9999	Tukey's multiple comparisons test
	Anterior hypothalamic nucleus	0.1561	6648		>0.9999	Tukey's multiple comparisons test
	Midbrain trigeminal nucleus	0.01587	6648		>0.9999	Tukey's multiple comparisons test
	Subparafascicular nucleus	0.1329	6648		>0.9999	Tukey's multiple comparisons test
	Claustrum	0.3656	6648		>0.9999	Tukey's multiple comparisons test
	Field CA1	0.9775	6648		>0.9999	Tukey's multiple comparisons test
	Lateral septal complex	0.7714	6648		>0.9999	Tukey's multiple comparisons test
	Gustatory areas	0.3531	6648		>0.9999	Tukey's multiple comparisons test
	Posterodorsal preoptic nucleus	0.0003731	6648		>0.9999	Tukey's multiple comparisons test
	Ventromedial hypothalamic nucleus	0.05383	6648		>0.9999	Tukey's multiple comparisons test
	Peripeduncular nucleus	0.02461	6648		>0.9999	Tukey's multiple comparisons test
	Caudoputamen	2.554	6648		0.949	Tukey's multiple comparisons test
	Interstitial nucleus of Cajal	0.01272	6648		>0.9999	Tukey's multiple comparisons test
	Nucleus raphe pontis	0.006701	6648		>0.9999	Tukey's multiple comparisons test
	Medial preoptic area	0.1163	6648		>0.9999	Tukey's multiple comparisons test
	Cortical amygdalar area, posterior part	0.168	6648		>0.9999	Tukey's multiple comparisons test
	Postpiriform transition area	0.08363	6648		>0.9999	Tukey's multiple comparisons test
	Mediodorsal nucleus of thalamus	0.1538	6648		>0.9999	Tukey's multiple comparisons test
	Posterior limiting nucleus of the thalamus	0.01942	6648		>0.9999	Tukey's multiple comparisons test
	Periventricular hypothalamic nucleus, preoptic part	0.01312	6648		>0.9999	Tukey's multiple comparisons test
	Periventricular zone	0.01895	6648		>0.9999	Tukey's multiple comparisons test
	Anterior pretectal nucleus	0.1071	6648		>0.9999	Tukey's multiple comparisons test
	Medial preoptic nucleus	0.01749	6648		>0.9999	Tukey's multiple comparisons test
	Cuneiform nucleus	0.0216	6648		>0.9999	Tukey's multiple comparisons test
	Dentate gyrus	0.5441	6648		>0.9999	Tukey's multiple comparisons test
	Declive (VI)	0.1188	6648		>0.9999	Tukey's multiple comparisons test
	Accessory supraoptic group	7.774e-05	6648		>0.9999	Tukey's multiple comparisons test
	Central lateral nucleus of the thalamus	0.01065	6648		>0.9999	Tukey's multiple comparisons test
	Nucleus of Darkschewitsch	0.002161	6648		>0.9999	Tukey's multiple comparisons test
	Parabigeminal nucleus	0.003358	6648		>0.9999	Tukey's multiple comparisons test
	Infracerebellar nucleus	0.001726	6648		>0.9999	Tukey's multiple comparisons test
	Culmen	0.2585	6648		>0.9999	Tukey's multiple comparisons test
	Central lobule	0.1622	6648		>0.9999	Tukey's multiple comparisons test
	Anteroventral periventricular nucleus	0.003172	6648		>0.9999	Tukey's multiple comparisons test
	Triangular nucleus of septum	0.004882	6648		>0.9999	Tukey's multiple comparisons test
	Edinger-Westphal nucleus	0.002254	6648		>0.9999	Tukey's multiple comparisons test
	Simple lobule	0.1013	6648		>0.9999	Tukey's multiple comparisons test
	Ventral auditory area	0.1244	6648		>0.9999	Tukey's multiple comparisons test
	Ventral premammillary nucleus	0.001757	6648		>0.9999	Tukey's multiple comparisons test
	Nucleus of the optic tract	0.002814	6648		>0.9999	Tukey's multiple comparisons test
	Anterodorsal preoptic nucleus	0.000482	6648		>0.9999	Tukey's multiple comparisons test
	Intermediodorsal nucleus of the thalamus	0.001213	6648		>0.9999	Tukey's multiple comparisons test
	Olivary pretectal nucleus	0.0005442	6648		>0.9999	Tukey's multiple comparisons test
	Lingula (I)	0.001026	6648		>0.9999	Tukey's multiple comparisons test
	Posterior pretectal nucleus	0.0001555	6648		>0.9999	Tukey's multiple comparisons test
	Median preoptic nucleus	0.0009018	6648		>0.9999	Tukey's multiple comparisons test
	Lateral habenula	0.001275	6648		>0.9999	Tukey's multiple comparisons test
	Subparaventricular zone	0.004213	6648		>0.9999	Tukey's multiple comparisons test
	Ansiform lobule	0.1682	6648		>0.9999	Tukey's multiple comparisons test
	Rostral linear nucleus raphe	0.001508	6648		>0.9999	Tukey's multiple comparisons test
	Anteroventral preoptic nucleus	0.003825	6648		>0.9999	Tukey's multiple comparisons test
	Piriform-amygdalar area	0.04616	6648		>0.9999	Tukey's multiple comparisons test
	Cerebellum	3.11e-05	6648		>0.9999	Tukey's multiple comparisons test
	Nucleus sagulum	0.006281	6648		>0.9999	Tukey's multiple comparisons test
	Vascular organ of the lamina terminalis	0.004353	6648		>0.9999	Tukey's multiple comparisons test
	Medial habenula	0.06622	6648		>0.9999	Tukey's multiple comparisons test
	Septohippocampal nucleus	0.006033	6648		>0.9999	Tukey's multiple comparisons test
	Parapyramidal nucleus	0.01465	6648		>0.9999	Tukey's multiple comparisons test
	Fasciola cinerea	0.01225	6648		>0.9999	Tukey's multiple comparisons test

## Sheet: Sheet2
"Nucleus of the trapezoid body" "Subthalamic nucleus" "Bed nucleus of the anterior commissure" "Gracile nucleus" "Parasolitary nucleus" "Magnocellular nucleus" "Lateral terminal nucleus of the accessory optic tract" "Nucleus of the lateral lemniscus" "Anterodorsal nucleus" "Main olfactory bulb" "Ventral cochlear nucleus" "Rhomboid nucleus" "Cuneate nucleus" "Substantia nigra, reticular part" "Par…
