# Supplementary material for: Neural basis of adolescent THC-induced potentiation of opioid responses later in life
Source: Neuropsychopharmacology. 2024 Dec 10;50(5):818–27. doi: 10.1038/s41386-024-02033-8 (PMC11914220; doi:10.1038/s41386-024-02033-8)
Supplement: Supplementary file 3 — Supplemental Table 2 [file 41386_2024_2033_MOESM3_ESM.xlsx]

## Sheet: Sheet1
	THC-Cohort3_Veh-2588R_638cfos_LH	THC-Cohort3_Veh-2590R_638cfos_LH	THC-Cohort3_THC-2515R_638cfos_LH	THC-Cohort3_THC-2518R_638cfos_LH	THC-Cohort3_THC-2510R_638cfos_LH	THC-Cohort3_THC-2508R_638cfos_LH	THC-Cohort3_Veh-2579R_638cfos_LH	THC-Cohort3_Veh-2577R_638cfos_VG	THC-Cohort3_Veh-2578R_638cfos_VG	THC-Cohort2_THC-2R_638cfos_VG	THC-Cohort3_THC-2513R_638cfos_VG	THC-Cohort3_THC-2512R_638cfos_VG	THC-Cohort3_THC-2517R_638cfos_VG	THC-Cohort3_THC-2519R_638cfos_VG	THC-Cohort2_THC-4R_638cfos_VG	THC-Cohort2_THC-3R_638cfos_VG	THC-Cohort2_THC-1R_638cfos_VG	THC_Cohort4_Veh-19R_638cfos_VG	THC-Cohort3_Veh-2576R_638cfos_VG	THC-Cohort3_Veh-2589R_638cfos_VG	THC-Cohort3_Veh-2591R_638cfos_VG	THC-Cohort3_Veh-2592R_638fos_VG	THC-Cohort3_THC-2506R_638cfos_VG	THC-Cohort3_THC-2509R_638cfos_LH	THC-Cohort3_THC-2516R_638cfos_VG	THC-Cohort3_THC-2584R_638fos_VG	THC-Cohort3_Veh-2586R_638cfos_SS	THC-Cohort3_THC-2507R_638cfos_VG	THC-Cohort3_THC-2511R_638cfos_SS	THC-Cohort3_THC-2580R_638cfos_VG	THC-Cohort3_Veh-2587R_638cfos_VG	THC-Cohort3_Veh-2585R_638fos_VG	THC-Cohort3_THC-2582R_638fos_VG	THC-Cohort3_THC-2581R_638fos_VG	THC-Cohort3_THC_2583R_638fos_VG
Abducens nucleus	7	14	21	11	16	23	9	5	16	11	1	11	67	30	6	14	69	13	6	4	7	25	7	10	12	5	0	0	8	20	4	8	7	37	62
Accessory facial motor nucleus	3	2	1	2	0	1	3	3	3	5	3	1	13	5	2	3	19	6	3	1	5	1	1	1	2	2	0	0	2	5	2	1	7	7	12
Accessory olfactory bulb	1105	83	1124	1787	532	670	796	4	78	108	111	52	1104	8	410	927	1190	26	6	3	1	7	88	65	130	17	19	56	198	723	47	0	584	353	722
Accessory supraoptic group	0	0	1	1	0	2	0	1	0	0	0	0	1	0	1	1	0	1	0	3	0	1	0	3	1	0	0	0	1	0	0	1	0	0	3
Agranular insular area	3198	2114	4645	3933	3178	4813	1621	2238	1386	279	2441	1994	3847	1110	855	2527	8336	2047	902	2790	1370	1299	1362	1290	2961	812	5254	5329	1886	3270	900	1856	1792	3023	2852
Agranular insular area, posterior part	1454	1327	10157	7966	1161	2589	781	1705	966	901	629	2162	5920	1372	1640	3527	7639	1736	680	981	922	231	2485	1141	1683	234	2399	8026	1416	1003	791	802	2254	2752	3174
Agranular insular area, ventral part	2337	1625	6173	8044	1760	4366	707	2006	1087	508	1401	2304	4521	974	653	2495	7677	1321	998	2783	1184	753	1580	1466	3491	288	1940	3856	795	1407	856	1069	1978	3054	3094
Ansiform lobule	5047	4548	7181	8796	1707	5145	2557	5040	5717	2668	2874	4113	5745	838	2972	7426	17354	5427	2839	6152	1768	3187	5622	864	3111	1044	6068	2737	3570	2923	1271	706	4602	1890	3395
Anterior amygdalar area	293	261	2037	2119	546	710	217	347	325	579	169	470	1763	581	1099	1168	2933	719	176	241	259	60	320	491	539	92	0	442	299	315	268	84	1265	548	1825
Anterior cingulate area, dorsal part	4327	3968	3935	5350	1794	8102	701	1672	1297	420	826	879	4375	1741	789	1118	4075	907	802	3034	1413	158	2183	1859	2203	631	0	1067	1319	336	1526	598	2740	2509	6176
Anterior cingulate area, ventral part	5537	4277	3615	3993	2289	9841	1181	1133	1154	461	863	1077	2906	1342	1036	914	2572	1720	1216	2266	1008	53	1806	2134	1358	744	0	1477	965	449	719	440	2565	2909	5430
Anterior group of the dorsal thalamus	903	467	2489	4613	364	917	104	300	242	128	669	600	2103	773	297	494	2534	333	347	225	73	40	123	344	774	28	0	1975	651	469	176	146	479	616	1928
Anterior hypothalamic nucleus	713	712	1889	2472	326	1123	682	526	368	546	173	477	1868	554	303	419	1373	1174	379	754	175	103	356	1171	407	245	0	0	467	352	570	281	804	850	1490
Anterior olfactory nucleus	4518	2430	11723	15863	3996	9052	3518	2563	1681	726	1671	4573	14147	2461	5672	8219	14522	979	1364	3192	3183	1110	3959	3688	4523	309	62	5794	3538	3376	2004	1074	4617	7154	12957
Anterior pretectal nucleus	1137	978	1869	3919	521	1849	464	495	479	280	392	508	587	652	353	421	1370	1569	374	380	640	333	772	351	474	303	0	3719	502	382	290	111	1625	719	3031
Anterior tegmental nucleus	19	16	44	49	12	13	6	29	15	10	25	18	34	14	30	34	39	25	9	15	12	3	11	20	24	2	0	22	0	7	8	2	11	12	36
Anterodorsal nucleus	73	132	515	1265	71	230	100	67	93	340	456	289	978	174	196	681	1272	254	281	38	23	126	169	193	392	117	0	397	216	108	50	58	908	110	639
Anterodorsal preoptic nucleus	37	33	73	70	35	66	13	34	22	0	3	12	16	11	26	39	21	75	2	21	19	3	18	24	11	4	0	0	24	12	18	10	39	28	36
Anterolateral visual area	3216	1827	6709	7555	3491	5100	829	764	392	344	801	1502	3237	3223	1876	1692	3500	608	2970	1228	3393	90	1902	1761	2293	131	7313	2960	1555	2425	3056	1431	3369	2864	9268
Anteromedial visual area	2080	1516	4749	5863	1991	4951	263	324	160	225	208	1014	1938	883	28	12	526	530	199	1772	1015	4	1437	1908	676	56	7540	4164	504	256	348	527	845	741	3414
Anteroventral nucleus of thalamus	523	340	613	2506	269	409	60	141	249	236	432	319	896	215	227	425	2230	407	186	59	39	80	119	231	374	129	0	1408	193	316	144	137	995	223	568
Anteroventral periventricular nucleus	96	48	349	93	64	172	60	69	18	15	6	9	35	6	31	34	36	107	6	21	12	21	29	16	19	41	0	0	53	55	14	20	109	23	71
Anteroventral preoptic nucleus	117	45	122	118	59	127	25	18	13	11	7	8	37	7	40	36	36	89	3	76	24	6	7	10	9	11	0	0	61	20	22	6	46	64	81
Arcuate hypothalamic nucleus	404	152	291	520	438	659	43	161	91	407	27	43	22	187	180	347	68	136	103	202	114	29	76	264	95	74	0	0	55	69	37	66	180	79	452
Area postrema	106	59	284	168	79	14	88	5	51	84	0	24	280	77	56	60	154	23	0	72	34	0	110	104	3	0	0	0	217	107	41	13	3	135	256
Basolateral amygdalar nucleus	1329	1739	4805	7677	1634	2007	595	1509	1220	2259	684	924	5174	2174	2293	1168	8170	2353	1633	1037	1531	261	1034	2254	1081	461	747	1779	566	1183	2019	903	5221	2958	9531
Bed nuclei of the stria terminalis	1987	1027	5352	7193	2156	5270	1003	1733	784	351	416	1042	4051	1660	1400	2035	1759	1690	265	980	701	382	1258	1716	1215	129	0	2276	1512	936	843	461	2084	1896	3803
Bed nucleus of the accessory olfactory tract	59	85	192	182	31	162	47	33	55	105	12	33	243	58	41	63	185	124	66	62	19	5	47	101	38	16	0	39	59	22	62	18	42	66	223
Bed nucleus of the anterior commissure	8	0	19	31	13	25	0	5	2	0	0	3	17	12	1	5	0	5	0	1	0	1	3	8	1	1	0	0	7	5	1	0	9	9	13
Caudoputamen	21369	15914	52396	61862	15817	25002	6050	14282	12902	3655	7049	8178	31069	7856	7193	16168	32807	18038	5532	13546	4676	4810	6441	10069	8724	2213	24020	62022	23906	8638	6134	4808	14783	9791	23488
Central amygdalar nucleus	2970	1859	7012	9082	1628	2803	1279	2023	1172	2260	1266	1751	7172	2634	2622	1995	9031	1555	2385	1237	2171	409	1992	4532	1530	602	903	6460	1225	1583	1911	1868	3958	3504	7873
Central lateral nucleus of the thalamus	188	283	191	754	37	57	56	94	124	295	115	134	321	62	49	80	882	192	84	53	12	17	59	106	130	56	0	539	52	94	34	38	168	73	460
Central linear nucleus raphe	144	35	144	93	155	82	43	23	110	67	54	28	202	91	50	75	360	100	5	31	68	51	32	158	71	15	0	0	52	46	40	28	26	94	171
Central lobule	3407	1963	2347	7013	1230	1824	1294	1788	2480	970	1453	2988	3677	1204	1645	4955	8842	1554	2221	1544	1310	3783	1694	627	2242	611	0	3281	874	1181	805	283	2208	981	2142
Central medial nucleus of the thalamus	391	146	873	1313	229	348	118	125	107	124	313	324	1328	426	352	252	1727	165	354	177	120	26	97	372	315	15	0	0	239	288	210	54	356	403	1697
Cerebellum	2	0	1	0	0	0	0	0	0	0	0	0	0	0	0	1	1	0	0	0	0	0	0	0	0	0	0	0	0	0	0	0	0	1	0
Claustrum	2574	1219	3718	4738	1854	3314	1157	1342	627	289	640	1133	3295	1186	390	1339	2350	650	1097	2191	1552	544	1579	1748	1729	459	344	1721	715	1139	1795	1692	1614	2139	2369
Copula pyramidis	3008	1045	4345	7953	1299	1492	749	1015	1382	320	754	1751	4837	621	1818	2218	2093	1143	546	1142	891	911	1376	740	1287	407	930	7175	1094	386	676	436	656	272	2801
Cortical amygdalar area	269	408	1271	654	29	1004	108	259	204	510	122	222	975	168	340	330	1956	863	208	285	196	64	214	489	301	156	0	41	288	241	201	106	457	387	1552
Cortical amygdalar area, posterior part	533	1555	2325	3096	2065	2006	374	578	545	1004	144	320	1509	457	459	342	3288	2665	461	804	676	83	789	1233	352	222	0	205	333	385	486	454	1421	1069	3329
Cortical subplate	2956	2495	8669	12173	3608	4850	1009	2124	1710	2240	1243	1887	7756	2195	2362	2912	8934	3038	1623	2573	2346	669	2067	3370	2483	702	422	2247	1537	1776	1916	1156	4341	3983	8989
Culmen	5706	3061	5378	8409	2123	3733	1994	2109	3965	1811	3087	3231	6054	1385	2965	5085	17200	2843	4004	1429	2315	3131	1235	946	2559	807	3833	3546	4017	1880	934	400	3725	1969	3386
Cuneate nucleus	446	299	1619	2519	480	735	267	151	254	221	1436	972	1682	341	1105	1035	2618	344	594	582	120	97	281	1080	599	20	0	444	1412	688	193	423	1248	745	1668
Cuneiform nucleus	208	215	159	1404	79	97	90	193	217	197	146	145	396	140	65	160	341	144	63	169	119	26	99	167	187	137	0	667	57	82	62	45	133	145	325
Declive (VI)	865	1729	2938	2932	666	1160	309	543	1677	1014	1099	1163	2193	362	785	1195	6266	1300	2008	547	631	432	383	459	814	425	153	984	1447	992	213	244	1455	795	1786
Dentate gyrus	5242	3752	9977	19219	3324	8134	4146	3652	3195	3021	2862	3204	8075	3401	2862	5035	13156	7483	4422	2990	2631	989	3208	2542	3111	1169	7572	9687	5137	2249	2487	1369	4711	2532	8478
Dentate nucleus	1222	388	2218	3248	691	1276	797	634	485	54	1190	1639	990	880	750	1480	1350	115	577	779	517	695	1439	116	2021	174	926	1353	417	484	651	91	607	357	1509
Diagonal band nucleus	473	530	1049	1011	651	849	236	450	468	243	107	327	878	166	1147	1009	1180	432	125	495	202	101	216	401	391	85	0	1	252	198	222	93	834	488	1348
Dorsal auditory area	5862	6088	12112	26400	8081	12776	3170	2596	2569	4800	2605	3552	9243	7054	4383	4746	18632	3145	6335	5454	8576	614	4352	7928	4691	1832	21713	8193	1873	3042	7178	2738	12287	7124	30284
Dorsal cochlear nucleus	1088	562	3713	3694	1803	2039	1065	472	640	120	1536	1759	2925	1507	1970	3358	2297	435	1251	678	1224	768	645	1094	1272	90	4	3397	1753	1286	621	507	1092	1215	3716
Dorsal motor nucleus of the vagus nerve	150	220	477	627	270	93	172	127	213	125	154	136	378	106	203	205	610	74	31	129	337	12	158	402	80	120	0	0	264	361	87	209	268	474	436
Dorsal nucleus raphe	150	131	154	1007	133	185	21	68	136	118	28	40	384	148	30	59	468	136	0	67	92	39	49	110	237	51	0	0	32	38	48	53	4	34	462
Dorsal part of the lateral geniculate complex	504	757	1157	1960	589	1175	1476	440	391	1181	569	828	1905	649	773	1629	2548	659	1290	494	1059	351	1731	416	862	624	713	2960	500	451	464	146	3235	713	3870
Dorsal peduncular area	456	239	587	1255	233	338	14	119	115	7	140	141	594	143	37	126	690	120	112	80	102	114	33	90	184	23	0	170	69	207	50	126	50	527	405
Dorsal premammillary nucleus	45	61	102	55	152	194	111	37	36	44	47	31	75	12	69	56	59	61	32	56	36	4	22	106	51	22	0	0	27	46	26	27	52	68	116
Dorsomedial nucleus of the hypothalamus	984	799	1135	1945	1721	1956	664	569	491	717	360	427	1020	413	444	334	950	802	577	903	431	76	708	1475	484	367	0	0	407	499	356	381	639	1030	1363
Ectorhinal area	4480	1896	6192	7390	3145	8309	1531	2355	1436	722	1785	1962	2668	2079	367	1040	4870	3086	787	5657	2151	612	4565	2158	2784	1205	4411	4372	1688	1681	1629	1947	4390	3715	5914
Edinger-Westphal nucleus	166	23	90	156	194	35	44	12	36	8	0	21	50	102	8	14	139	52	0	19	18	28	10	5	73	3	0	0	23	6	24	3	0	2	296
Endopiriform nucleus	3594	2476	9730	13996	3927	5506	1357	3197	1843	1642	1336	3163	11605	4033	4923	5570	9586	2109	1822	3483	3005	440	2990	5086	4277	494	1603	5365	1022	2262	4223	1933	8249	5182	13627
Entorhinal area	118	94	777	802	492	357	36	58	100	241	4	18	107	54	112	144	722	422	211	68	177	10	33	110	34	6	6	0	46	45	66	52	472	249	390
Entorhinal area, lateral part	9584	9690	38774	47378	7659	12991	3273	7657	5721	5568	9244	11387	28464	8679	20609	25879	58817	9840	6231	12574	5805	1502	14115	8402	13143	1309	11189	3144	8447	10612	8001	5661	12893	14569	36306
Entorhinal area, medial part, dorsal zone	3518	2884	7192	16335	1970	4493	699	2368	1852	2727	2398	2712	9468	1846	2339	5084	16417	2709	743	5871	1933	926	3143	2412	3572	534	3969	2550	1683	1353	1782	990	3013	3637	10726
External cuneate nucleus	327	109	1288	1158	459	605	165	126	119	91	608	203	975	336	429	488	627	235	314	395	246	75	276	953	279	34	0	281	448	98	154	261	155	314	528
Facial motor nucleus	108	703	628	458	320	412	195	517	514	900	712	974	1855	880	1148	1807	4228	209	952	634	1473	362	489	425	1259	352	0	215	145	1561	231	261	1655	1216	2190
Fasciola cinerea	12	41	57	16	7	4	2	0	22	15	2	0	19	0	12	5	55	26	43	8	9	0	2	1	3	2	0	4	6	0	1	0	4	1	2
Fastigial nucleus	599	401	746	3585	175	180	708	1028	659	166	596	1031	1039	662	635	875	1490	341	814	401	284	83	952	18	1036	609	0	681	215	354	467	41	708	277	1146
Field CA1	6435	4113	12689	26144	3513	6441	2693	2723	2983	1793	2613	3512	7752	4572	3582	6059	17927	8267	4455	3057	4724	1046	3790	2345	3620	567	12273	14475	3643	3099	2734	871	6870	4162	14987
Field CA2	1781	815	4561	6042	1166	2765	1720	428	511	943	1445	2231	2509	931	1837	2650	4829	1262	1718	1206	1422	408	1898	782	1572	173	4757	4205	1312	1426	568	475	2511	1209	3948
Field CA3	4904	3417	16033	20620	3480	8668	5853	1984	2269	4138	2882	6310	9163	3726	4716	7262	19527	6751	4520	3556	3897	1194	4621	2415	3905	602	9890	21876	4287	3057	1974	1290	9113	4026	12446
Fields of Forel	211	78	373	296	156	255	51	75	76	76	71	184	419	287	51	141	176	137	51	197	135	36	180	242	119	6	0	227	229	67	89	163	184	113	452
Flocculus	3358	993	6028	4082	4103	715	1401	380	350	339	1266	1538	9344	2463	2832	5271	4941	682	555	352	3556	2002	876	4064	2654	108	1667	2001	2510	1046	880	821	2417	2227	8846
Folium-tuber vermis (VII)	210	240	2194	1417	181	138	24	30	284	229	162	154	778	186	89	108	1477	252	82	108	5	57	156	726	111	68	0	465	381	120	47	87	194	65	269
Frontal pole, cerebral cortex	2030	387	3952	1816	1375	714	877	209	244	123	203	1218	1423	193	998	1094	512	162	3	3	8	349	445	585	693	212	1015	579	1682	586	456	0	950	1212	736
Fundus of striatum	157	171	1304	1270	146	506	118	235	199	52	62	219	276	201	385	405	500	307	40	110	108	40	126	213	97	41	5	535	240	115	53	32	478	354	718
Gigantocellular reticular nucleus	1221	1559	3742	3239	1502	2991	1042	1236	1849	2050	761	2003	2927	1823	2091	2731	8093	1593	851	1448	1841	367	1671	1051	2118	851	0	0	2446	2502	1276	933	2616	2449	5047
Globus pallidus, external segment	3001	1558	11489	13919	1862	5657	1835	2344	1519	1626	3139	5151	10007	3460	4180	6043	12208	1306	2439	2172	1035	364	3379	2198	4199	136	1404	10395	2702	2436	966	729	3579	2498	6350
Globus pallidus, internal segment	376	353	1594	1752	178	500	181	331	309	710	203	506	1665	568	1165	896	2384	459	730	395	235	25	774	888	367	47	0	3279	366	242	429	191	811	490	1617
Gracile nucleus	186	47	290	317	317	48	8	9	39	96	10	99	290	51	122	139	414	31	15	14	0	1	14	189	86	1	0	0	278	215	17	11	74	129	114
Gustatory areas	1949	2177	6749	3035	2253	3300	1150	2412	1318	287	1406	1082	2203	501	444	1939	4219	1907	533	1837	812	930	1577	677	2486	511	6528	4924	1370	2133	683	1232	1684	1863	2151
Hippocampal formation	2088	2121	6066	9069	2236	5343	916	1527	1489	2929	1365	1617	5315	2327	1390	2610	10847	2286	1312	2197	1665	989	1537	1922	1358	518	3035	1681	2115	1721	1232	691	2937	3272	6723
Hypoglossal nucleus	336	637	758	534	556	359	152	406	327	825	329	516	1229	305	386	495	2010	391	36	302	399	11	222	419	245	193	0	0	855	800	210	455	688	958	1258
Hypothalamus	6691	3407	11178	10089	6081	10101	3072	2614	2097	4493	2208	3039	7954	3792	3436	3518	7481	4082	2537	4153	2877	1079	3216	7898	2980	1522	0	2389	5098	2768	2375	2177	6269	4575	8943
Induseum griseum	5	17	10	38	18	22	15	10	18	24	7	5	10	25	12	7	22	7	15	4	2	0	11	50	17	3	0	4	10	42	7	6	10	11	19
Inferior colliculus	6735	7817	10895	20781	8496	15813	4364	3665	4781	6216	7803	6188	15728	5396	3190	6864	11095	4748	2931	7010	5226	4592	2919	6551	5784	3118	7227	2783	11281	6536	2772	2429	7959	3775	16207
Inferior olivary complex	315	140	714	1628	242	157	123	81	227	190	57	147	221	52	206	238	61	40	21	104	38	19	61	65	47	113	0	0	240	87	12	27	0	140	301
Inferior salivatory nucleus	22	7	27	24	28	45	15	5	8	10	16	37	60	52	8	25	42	17	19	34	11	13	11	18	16	3	0	29	56	27	4	18	24	14	36
Infracerebellar nucleus	62	8	43	75	17	14	13	16	14	6	25	42	11	4	19	28	23	12	3	17	20	15	28	2	24	3	0	23	18	10	20	1	19	10	21
Infralimbic area	2298	1846	2249	4402	1308	3280	239	932	916	106	954	851	3234	969	529	1996	2086	961	493	607	642	278	427	1570	1501	551	0	1033	334	1224	521	863	1051	2798	2307
Interanterodorsal nucleus of the thalamus	136	150	354	1144	38	30	21	42	68	28	144	81	174	154	33	61	1011	69	50	17	21	16	9	24	128	8	0	434	37	72	134	15	84	101	439
Interanteromedial nucleus of the thalamus	111	54	225	194	40	160	39	25	37	18	24	33	279	73	63	75	302	52	39	29	16	8	24	73	66	0	0	0	59	79	26	20	74	62	395
Intercalated amygdalar nucleus	224	174	755	897	371	347	103	188	161	260	82	129	570	215	241	214	600	260	163	143	146	19	231	466	176	70	12	455	63	142	231	87	386	295	816
Interfascicular nucleus raphe	51	17	199	122	190	108	74	8	57	32	16	27	177	98	45	38	176	65	0	30	38	22	38	61	57	1	0	0	44	28	79	46	4	124	157
Intergeniculate leaflet of the lateral geniculate complex	248	146	406	291	217	382	71	144	58	94	203	199	305	160	103	201	125	172	92	222	304	68	244	201	259	90	113	195	85	89	118	221	498	127	536
Intermediate reticular nucleus	1309	2434	6540	7515	2094	4778	1259	1947	2023	3570	2151	3206	6147	2624	2776	3909	15204	3080	2417	2543	2668	394	2036	1482	3074	961	0	541	5739	5943	1620	1190	6507	3732	8180
Intermediodorsal nucleus of the thalamus	332	168	141	846	135	152	57	42	72	33	23	42	226	84	26	27	632	70	44	27	45	6	53	45	72	21	0	0	25	46	23	80	156	53	470
Interpeduncular nucleus	864	248	1023	582	453	809	327	135	183	595	114	204	568	221	346	418	1158	431	63	308	252	117	338	197	226	80	0	0	759	308	113	100	202	472	530
Interposed nucleus	2880	736	3587	8533	886	2225	1845	2068	1126	263	2435	3899	2439	1624	1702	2743	4037	438	1224	1883	1229	642	3516	136	3738	920	1009	3217	497	1273	1433	131	1859	758	3204
Interstitial nucleus of Cajal	102	38	192	265	137	57	48	79	53	9	42	71	84	187	11	15	181	93	32	59	41	8	66	10	78	3	0	127	29	47	58	29	54	24	261
Isocortex	3202	2423	7527	10268	4219	6467	957	902	811	1227	1401	2228	5350	1819	347	865	5453	1320	860	4337	2534	260	2401	5199	2071	613	8835	2414	1147	1559	1993	1110	2219	3037	7335
Lateral amygdalar nucleus	938	729	2667	3556	1032	694	327	457	420	566	565	602	1895	852	509	471	3014	512	524	733	885	97	511	860	605	121	455	1872	495	545	576	460	1009	790	1965
Lateral dorsal nucleus of thalamus	305	790	1325	2377	268	710	267	405	636	2743	986	1208	2589	549	742	986	5541	1160	1828	391	239	150	477	740	847	658	59	2456	644	636	421	140	1111	693	2911
Lateral habenula	199	372	175	155	184	466	115	121	166	383	157	128	379	68	26	46	337	181	418	209	133	57	115	278	126	187	0	349	95	75	112	75	306	150	444
Lateral hypothalamic area	3529	3202	7638	10027	3548	6511	2787	2557	2271	4459	1353	2451	7741	3162	2648	2359	8527	4212	2768	3305	1640	404	2409	6426	2675	806	0	3642	2409	2094	3462	2000	5123	4559	8323
Lateral posterior nucleus of the thalamus	311	857	611	1843	492	785	518	427	432	1167	664	872	1461	400	210	246	2147	764	1066	267	493	267	981	500	512	447	358	3273	353	386	178	209	1603	435	2426
Lateral preoptic area	1046	683	2199	2526	805	2474	698	795	455	305	125	560	1295	493	877	1041	1688	1091	190	720	416	204	575	874	632	118	0	68	690	467	611	175	1254	950	1878
Lateral reticular nucleus	492	688	2064	6931	714	1809	1091	326	410	1210	1308	1269	2833	821	2017	2234	4750	459	1102	1743	850	190	1275	1438	645	1969	0	43	1855	2528	745	1208	2089	2315	4009
Lateral septal complex	8253	4025	7660	9326	7775	8792	2735	2293	1776	441	1690	1547	5619	2316	1192	2117	2846	3011	1646	4275	2508	469	2201	3812	2458	659	0	2541	3159	2670	3040	2667	4394	4501	6278
Lateral terminal nucleus of the accessory optic tract	7	1	53	99	22	72	0	1	0	2	20	25	22	21	7	15	11	4	1	21	14	3	25	9	18	1	0	59	15	10	8	14	21	9	59
Lateral visual area	4510	3281	9164	11181	6377	10204	1442	1374	1133	1772	3022	2984	7955	5104	1831	2502	10781	1218	4002	3059	4029	410	2836	7366	3326	530	5990	1839	2073	5808	6727	2029	6248	6782	17077
Laterodorsal tegmental nucleus	160	163	142	205	189	78	75	93	121	52	51	144	344	306	56	145	118	71	35	76	102	112	131	75	136	38	0	187	14	26	60	142	63	49	325
Linear nucleus of the medulla	16	15	72	174	53	70	21	28	30	70	37	67	115	80	42	81	144	44	32	93	84	5	57	21	96	84	0	2	75	56	41	97	57	70	128
Lingula (I)	683	55	350	141	136	249	69	69	85	21	23	168	31	95	119	318	244	94	9	58	27	52	72	31	157	15	0	64	78	31	60	29	46	40	116
Locus ceruleus	81	63	147	59	79	23	29	31	24	40	58	76	181	158	59	84	171	13	24	39	124	71	69	11	79	43	0	58	5	14	42	97	29	72	142
Magnocellular nucleus	91	124	1513	2073	240	540	208	215	225	264	138	528	608	321	1174	1240	1584	292	64	120	238	64	72	102	528	50	0	95	192	207	66	32	1162	487	1229
Magnocellular reticular nucleus	378	505	474	2401	297	212	188	379	401	311	154	568	1223	389	673	1056	2695	228	83	559	786	124	302	245	752	522	0	2	359	551	136	217	70	454	1818
Main olfactory bulb	22473	1028	28254	40414	9781	30940	1754	1528	200	862	381	4091	23696	906	4647	6711	11037	380	54	19	67	1582	5254	2507	4524	43	2538	8211	10726	9769	3086	146	8174	10896	22402
Mammillary body	442	379	680	544	196	877	165	148	170	119	136	204	298	155	376	353	1102	620	175	208	216	90	128	243	135	73	0	0	269	89	18	48	562	263	556
Medial amygdalar nucleus	827	1447	3630	5164	1699	2062	632	880	1064	2874	347	719	4329	948	1417	1017	4575	2493	1369	1027	824	130	802	3010	785	188	0	2849	464	545	926	530	2044	1305	4503
Medial geniculate complex	625	266	603	1195	144	581	267	502	207	364	258	451	560	331	330	1069	2198	656	711	298	219	122	418	134	525	108	984	969	228	280	156	32	2249	471	1879
Medial habenula	268	249	432	277	189	243	230	75	164	173	55	77	208	39	51	83	353	308	91	218	185	28	181	113	69	126	0	232	112	71	107	50	166	47	250
Medial preoptic area	960	575	1544	1289	845	1821	677	628	271	192	85	293	795	214	460	595	856	1204	114	671	488	177	432	654	420	193	0	0	526	478	448	160	923	667	881
Medial preoptic nucleus	154	142	315	375	147	362	149	143	47	62	30	22	136	33	68	83	183	316	19	68	73	34	76	155	44	39	0	0	68	84	40	42	274	105	221
Medial pretectal area	143	155	219	350	224	366	119	57	62	20	35	42	214	110	17	17	33	175	54	124	98	1	141	124	64	37	0	157	51	58	67	27	160	112	320
Medial septal nucleus	1754	756	1312	1487	1041	2028	577	574	343	40	190	249	1093	345	336	497	400	446	181	562	512	179	511	710	347	83	0	0	653	585	502	344	1128	852	1623
Median preoptic nucleus	277	132	274	252	155	446	316	153	58	8	11	34	136	23	124	148	72	234	18	147	72	28	76	117	39	16	0	0	139	103	62	37	218	150	206
Mediodorsal nucleus of thalamus	2001	1735	1934	7891	981	1459	319	429	776	532	904	508	2197	872	315	400	5848	1014	599	532	255	87	346	660	812	429	0	3452	488	583	423	547	1149	633	2864
Medulla	11825	8824	29215	36378	14600	16928	7800	6145	7200	8681	12942	14877	25559	11094	13460	17866	35622	7792	7816	10792	9210	3695	8368	11971	10535	5108	1	11470	23640	19394	6034	7283	16773	13925	30116
Medulla, behavioral state related	17	3	316	28	145	0	61	50	123	184	0	153	558	188	79	120	35	79	0	100	115	0	47	172	18	38	0	0	214	20	38	165	0	4	342
Medulla, sensory related	2039	1385	6599	6010	2948	4652	2104	1783	1477	2901	5274	4105	7944	3313	4193	5293	8429	1549	2729	2891	3062	796	3223	2780	3554	1205	0	4687	4426	6128	2323	2461	5638	5335	7940
Medullary reticular nucleus	723	1622	2518	4740	1208	2828	495	784	716	1508	2157	1490	3273	506	1386	1574	5121	1132	579	2028	477	141	724	1403	779	677	0	454	4127	3432	639	1097	4057	1590	4294
Midbrain	10849	4990	18328	25078	7366	16158	3879	4406	4080	4293	5027	6378	12213	7902	3854	6372	14914	7208	4091	5510	5032	2578	4940	5992	5523	2495	1014	13050	8319	4295	4042	2440	8046	5232	16333
Midbrain reticular nucleus	10534	4926	13484	31070	6941	11198	2892	5726	4284	2947	4210	5240	11464	7874	2587	5064	12640	8189	2679	6219	4140	1409	5062	3661	5333	1452	25	31437	6332	3452	4091	3307	7226	4125	16379
Midbrain reticular nucleus, retrorubral area	713	446	1644	2458	835	1651	176	505	465	228	747	752	2039	774	380	876	1936	749	464	648	297	287	596	642	597	96	0	3492	563	400	305	322	489	529	1830
Midbrain trigeminal nucleus	45	64	125	197	115	77	34	54	69	82	73	58	136	140	28	44	113	21	46	39	108	63	34	77	39	48	0	62	46	19	23	105	39	74	126
Nodulus (X)	4139	561	4276	3279	1174	1339	1662	678	819	658	502	2296	2791	1036	1901	2967	2504	1089	304	480	637	454	807	703	998	127	0	2209	851	343	624	211	292	445	2880
Nucleus accumbens	2778	3113	6244	9588	3596	6416	1227	2894	2742	473	488	1508	7799	1481	2057	3106	2556	738	709	2726	1091	198	1852	5002	2828	687	0	2227	1217	840	1110	755	2979	2842	5534
Nucleus ambiguus	34	42	128	166	23	45	27	40	36	146	54	73	120	27	64	56	246	24	38	18	51	3	51	29	33	60	0	85	42	79	40	27	96	88	94
Nucleus incertus	196	212	146	84	466	129	51	75	183	77	90	88	425	130	50	106	289	88	32	71	143	186	52	364	127	53	0	0	252	163	31	232	151	337	364
Nucleus of Darkschewitsch	55	15	61	143	56	18	4	18	37	6	13	12	38	70	3	10	84	40	7	17	16	0	19	2	14	2	0	35	20	14	19	11	22	11	111
Nucleus of reuniens	376	559	1221	1119	295	1503	331	285	291	435	210	413	1830	195	933	944	1603	558	609	368	82	47	279	669	240	24	0	0	283	235	153	136	1317	474	1427
Nucleus of the brachium of the inferior colliculus	208	144	237	464	94	385	85	156	78	249	95	151	433	131	34	207	401	230	137	95	85	58	115	160	238	85	105	184	227	85	64	25	323	176	514
Nucleus of the lateral lemniscus	701	644	3455	4469	559	3046	386	667	653	2019	2055	2444	4638	1403	3129	4456	5092	447	1692	1085	404	501	1360	1804	1791	141	0	5638	1199	1936	616	427	1723	1363	4385
Nucleus of the lateral olfactory tract	151	207	615	553	69	655	74	124	156	395	24	110	691	126	273	321	1441	508	113	148	97	34	182	300	167	49	0	90	92	133	223	41	331	268	865
Nucleus of the optic tract	308	112	228	493	41	342	62	28	39	31	19	84	49	151	27	34	130	110	83	34	48	32	50	49	36	30	0	285	80	29	25	12	94	67	154
Nucleus of the posterior commissure	311	217	498	659	306	771	135	156	141	46	89	72	344	358	79	104	77	366	72	170	156	36	233	253	181	85	0	693	113	86	63	106	467	210	697
Nucleus of the solitary tract	690	766	2658	2522	1406	807	662	263	590	523	1293	785	2152	870	819	893	2998	931	481	530	594	100	576	1195	456	80	0	413	3974	1294	654	509	2135	1375	3023
Nucleus of the trapezoid body	25	83	740	847	79	342	93	67	51	296	134	527	1456	119	859	830	1527	42	57	257	186	26	279	137	534	112	0	0	222	574	135	169	133	933	1758
Nucleus raphe pontis	104	99	71	52	83	49	1	7	31	59	2	28	70	14	22	16	45	20	0	22	23	19	32	59	30	7	0	0	40	20	4	19	3	51	30
Nucleus sagulum	60	60	4	277	0	24	8	41	49	52	46	13	68	14	20	56	160	82	21	30	5	4	17	10	27	17	0	145	3	23	5	3	33	11	54
Nucleus x	104	116	258	606	224	301	91	58	67	33	240	152	373	200	120	212	227	98	116	181	149	20	144	129	162	39	0	284	521	253	93	92	198	228	302
Nucleus y	82	30	131	232	68	146	52	49	44	17	76	83	83	58	54	107	48	46	55	43	73	40	62	34	70	13	0	138	37	31	33	25	24	17	115
Oculomotor nucleus	54	21	12	330	4	44	10	31	31	29	23	26	77	92	6	27	122	31	7	20	18	5	8	4	17	8	0	0	5	10	11	3	20	12	193
Olfactory areas	7642	2767	14866	15441	6553	9600	2828	2471	1989	2015	2172	3889	10958	2836	5479	7556	11848	2222	1497	2586	2156	1560	3083	4890	4619	484	615	3125	5544	3773	3252	1051	6365	5207	10208
Olfactory tubercle	927	1630	7068	2970	1579	1896	555	714	1622	667	274	986	1820	426	1064	1499	2114	1103	486	1067	293	230	813	1049	557	477	0	453	515	409	752	188	1547	1231	2532
Olivary pretectal nucleus	42	86	73	167	46	164	27	20	31	6	26	37	43	39	14	12	22	113	60	26	11	5	23	28	8	12	0	301	12	12	14	10	46	27	197
Orbital area, lateral part	1968	1507	2452	4135	819	2467	129	1288	899	150	2014	1484	4476	1320	2288	5282	8398	1271	549	1101	1063	1013	550	2036	2596	585	667	2397	951	3431	720	1623	1694	2725	3169
Orbital area, medial part	1935	890	1648	1494	383	1212	91	648	536	90	135	1198	1767	422	748	1179	533	559	99	487	214	354	213	748	567	185	0	244	535	268	288	222	277	970	781
Orbital area, ventrolateral part	2433	1042	3496	3948	1743	2195	1013	905	763	159	1166	1155	3364	842	1964	3849	5454	830	317	494	719	461	504	1552	1654	409	3	1396	1843	1764	997	868	883	1977	1939
Pallidum	1859	977	5303	5697	1527	3171	944	1221	997	898	655	1272	3237	1531	2526	2762	3863	1221	678	970	735	344	1068	1780	1420	177	100	3022	1367	1075	689	370	2265	1627	3855
Parabigeminal nucleus	60	53	47	227	7	97	15	32	51	76	30	65	86	10	15	57	128	62	19	45	8	12	26	12	35	34	133	88	8	19	20	13	14	18	71
Parabrachial nucleus	1544	1101	1795	3411	1642	1487	673	1104	829	503	706	1315	2857	1569	928	1424	1141	509	351	1550	1199	1115	1054	1057	1415	417	0	2305	884	563	741	1006	787	698	2077
Paracentral nucleus	1670	576	2275	5240	602	871	231	302	198	235	1314	954	2304	1154	597	650	3821	215	508	699	133	9	399	280	1196	41	0	1485	784	944	331	397	523	608	2899
Parafascicular nucleus	126	345	49	397	88	76	158	135	132	213	130	111	326	105	81	91	433	141	37	86	60	17	75	62	95	45	0	574	22	74	26	78	711	69	276
Paraflocculus	4282	1065	55447	11549	7533	2655	2346	799	778	81	1843	2062	14216	1303	4349	7705	7834	1293	934	841	3769	3071	1378	1685	3257	197	11569	8202	3167	632	962	419	3087	1858	12972
Paragigantocellular reticular nucleus	855	840	1878	4557	974	1056	498	579	691	882	427	717	1683	686	829	1250	3139	522	459	655	1027	180	578	324	763	685	0	57	1492	1067	318	409	1015	1249	1720
Paramedian lobule	3467	2215	12031	12038	1543	3268	2287	2005	2083	615	1286	3263	8820	388	3584	5060	5646	1445	879	2665	1597	1799	3244	889	2021	486	7509	7101	2485	663	1028	412	1572	494	1596
Parapyramidal nucleus	88	29	76	98	36	12	99	10	11	3	8	9	29	8	10	29	0	6	14	10	18	9	7	5	11	24	0	0	44	17	0	0	0	5	36
Parasolitary nucleus	31	7	62	49	9	15	12	1	12	18	38	25	62	14	55	53	86	13	9	11	2	2	5	29	15	2	0	1	47	38	2	2	75	34	53
Parastrial nucleus	139	22	58	142	59	115	27	54	26	3	9	16	47	30	43	64	26	46	15	50	33	8	86	66	49	8	0	0	14	34	35	8	86	102	125
Parasubiculum	2422	725	3630	7652	252	2157	752	891	665	1036	731	961	3394	317	823	2208	5850	951	292	2256	545	258	1265	657	859	232	1435	1324	1576	490	478	159	690	581	3175
Parasubthalamic nucleus	78	67	180	212	229	258	42	62	47	128	17	64	406	112	63	36	164	79	24	63	53	63	99	175	58	79	0	26	87	100	23	62	307	214	322
Parataenial nucleus	737	301	1363	1996	852	1324	307	248	236	136	309	297	1599	884	325	468	1344	338	311	244	174	66	234	725	598	95	0	204	414	401	516	229	541	844	1366
Paraventricular hypothalamic nucleus	474	279	1069	1284	1122	879	687	261	152	464	99	243	502	663	191	229	545	401	240	464	345	166	617	1505	311	77	0	0	248	417	385	172	582	1006	509
Paraventricular hypothalamic nucleus, descending division	263	42	372	398	221	407	220	73	50	84	86	64	109	90	96	99	196	82	71	125	18	20	139	196	78	11	0	0	69	78	79	131	129	136	208
Paraventricular nucleus of the thalamus	1175	442	1700	3099	1865	3084	701	521	368	372	581	700	2172	1474	123	246	1260	589	536	192	664	392	514	1825	820	408	0	110	991	989	834	740	1172	1796	2435
Parvicellular reticular nucleus	1995	2007	8176	6950	2518	4696	1186	1720	1520	2706	2458	3115	5986	3147	2710	4015	11080	2616	2265	2719	2496	605	2002	2180	2838	1276	0	2912	7565	5502	1524	1637	5620	3345	7892
Pedunculopontine nucleus	1135	543	2123	3262	787	2159	246	649	501	235	727	789	2161	627	624	1064	1361	697	214	1026	459	251	685	835	731	142	0	3212	524	462	629	612	450	556	1826
Periaqueductal gray	5064	4803	6127	14770	3509	7243	2952	3216	3805	4423	4017	2838	9606	4576	1891	4332	6854	4983	3017	3148	3743	1575	2173	4459	3949	3708	0	4442	4474	3039	2680	2184	7019	3753	9474
Perihypoglossal nuclei	349	181	343	494	247	219	138	145	238	276	376	577	634	399	253	640	997	294	130	152	76	158	167	95	227	53	0	0	834	414	131	137	346	325	906
Peripeduncular nucleus	268	64	264	553	162	425	123	94	18	29	60	123	75	151	21	46	267	75	55	208	107	33	180	15	140	26	0	391	265	97	93	87	111	87	209
Perireunensis nucleus	14	30	36	47	3	51	8	8	9	18	11	23	51	9	50	41	86	27	31	13	5	0	15	8	7	0	0	0	27	2	9	1	34	16	93
Perirhinal area	3112	2230	9565	9267	2798	5506	1445	2116	1179	795	1764	2795	5576	853	1029	2519	8544	2966	1219	2871	1501	370	5174	1363	2242	344	3360	6028	1838	2010	1128	1404	2550	2005	3229
Periventricular hypothalamic nucleus, posterior part	263	57	157	108	194	448	74	97	68	100	45	42	76	72	80	71	42	122	37	83	220	57	78	170	67	86	0	0	81	107	14	47	51	193	245
Periventricular hypothalamic nucleus, preoptic part	108	85	246	242	139	260	159	80	25	38	7	33	119	17	38	64	46	136	27	57	94	20	57	123	28	13	0	0	34	67	49	8	99	79	82
Periventricular zone	233	157	153	233	124	268	59	101	68	106	40	109	187	46	29	42	92	134	126	125	116	21	108	186	60	65	0	0	84	87	98	21	211	175	173
Piriform area	7981	10049	40236	58542	7658	23010	5533	10059	7742	9655	6242	15977	44066	13621	28199	29114	59512	10951	8739	14535	10735	3412	12308	18367	22112	2199	1749	8678	5131	7425	9728	4312	39840	21127	64292
Piriform-amygdalar area	143	503	715	538	211	212	54	182	255	573	41	84	424	109	165	94	1017	820	197	395	159	36	98	398	110	93	0	0	152	121	196	101	661	325	1219
Pons	10035	6150	21040	17742	9539	12847	4707	4380	4407	9651	5065	9663	22524	9378	9591	13727	25004	4892	4636	8748	7059	4889	7151	11283	9855	2407	23	12560	10510	9074	4811	5611	9494	8662	19545
Pons, motor related	14704	7886	32162	22262	14341	19180	4959	4621	5635	11642	4141	8952	28134	11995	8152	12194	29366	7605	5835	9777	7365	4908	8794	15717	12077	2486	0	3184	20659	10297	6072	10205	10979	10121	33639
Pontine reticular nucleus	2242	2838	8084	8431	2357	5768	1632	1490	2434	4983	2319	3024	8804	2564	4306	6422	9395	3325	1885	2306	1516	1007	2016	4308	2343	744	0	10128	3312	3520	2066	1510	3320	3857	9002
Posterior amygdalar nucleus	225	323	834	932	741	729	139	159	123	138	41	53	577	185	287	235	675	416	86	307	286	29	116	362	99	40	1	152	165	129	146	137	471	377	803
Posterior auditory area	266	291	665	1558	420	688	92	171	155	181	433	516	449	612	44	225	975	274	336	192	301	109	156	395	338	114	488	140	221	179	479	85	597	477	1281
Posterior complex of the thalamus	2086	1733	894	4051	513	461	1462	617	656	2249	1617	1821	5474	615	330	574	4232	600	1177	1647	461	95	783	315	1315	670	0	3417	544	775	419	322	3928	678	3531
Posterior hypothalamic nucleus	2075	1014	1879	2142	2220	3259	897	768	832	1195	739	826	2726	1312	795	651	1155	1248	505	1733	1144	202	1040	2435	831	306	0	0	1358	1169	1114	1108	2092	1702	2571
Posterior limiting nucleus of the thalamus	297	88	152	589	86	211	112	130	52	40	78	160	72	82	39	86	262	177	64	174	73	29	153	13	141	29	0	777	92	66	33	24	357	126	361
Posterior pretectal nucleus	85	56	113	243	40	139	43	25	38	3	22	23	39	56	5	13	32	106	22	41	12	3	36	27	12	10	0	189	12	13	12	3	61	36	163
Posterodorsal preoptic nucleus	0	1	4	9	3	5	0	2	3	0	0	2	6	2	1	0	3	7	0	1	1	1	1	1	1	0	0	0	3	0	1	1	3	0	4
Posterolateral visual area	1230	945	2192	3090	1558	2243	417	585	508	533	749	549	2220	836	94	199	3313	540	147	1331	722	95	665	2414	573	277	332	135	537	1116	727	294	1368	3251	4998
Postpiriform transition area	219	592	3096	2061	286	433	87	269	286	473	151	201	723	387	469	576	4183	1595	535	311	374	71	203	219	150	51	54	0	394	230	216	170	1694	687	2537
Postsubiculum	883	1012	6094	5472	1301	3437	895	332	417	1054	509	383	2771	333	302	874	3499	692	1158	328	170	260	262	730	426	122	2760	381	1944	555	209	69	585	533	3032
Precommissural nucleus	62	94	86	59	133	205	49	69	37	37	50	57	175	110	34	29	27	91	33	150	53	14	68	124	62	61	0	59	8	44	57	32	140	87	212
Prelimbic area	1870	1934	1796	3985	585	3375	301	1093	895	422	512	1714	2438	1104	523	1424	1553	697	408	979	695	568	739	1473	1349	806	0	622	293	451	651	401	859	1888	2129
Preparasubthalamic nucleus	24	26	31	59	6	20	0	22	11	33	10	18	29	15	31	14	37	23	10	10	9	1	9	25	14	2	0	28	18	7	27	16	39	39	37
Presubiculum	2565	910	7081	7363	1357	3471	1365	749	697	1660	990	1003	3823	739	726	2077	5617	1141	1203	883	626	609	797	1584	1118	271	2079	965	3950	890	986	376	1406	903	4613
Primary auditory area	4363	3115	12572	22878	6215	12385	1683	1983	1588	1477	2558	4002	3782	6222	2302	4029	6106	2795	4163	4258	7590	1192	4210	3258	3684	1155	10458	4450	2872	3378	6721	2295	8866	5488	21140
Primary motor area	11894	18558	38482	42107	6740	26462	5362	11191	11154	5677	8146	14012	34594	10856	18386	20544	40892	5816	8395	10452	4432	4313	11070	11502	18352	3132	27587	5218	8301	4979	6443	1301	16780	10161	35438
Primary somatosensory area, barrel field	9926	10888	22438	47482	15855	17980	3561	3345	4110	10066	4504	5339	23289	9489	5518	3698	28139	3159	13913	11039	5514	121	10885	18659	6371	1146	22602	9481	2760	6488	6427	1678	12853	8504	45415
Primary somatosensory area, lower limb	7303	4051	11483	16415	2318	9540	823	1200	1274	1684	2072	2867	7873	3619	2184	1523	6382	1126	2828	3665	1107	22	3403	4540	2384	285	13230	1306	4358	1965	2383	683	2798	3079	9768
Primary somatosensory area, mouth	1226	5208	11626	13968	2438	3663	1999	4077	4957	1734	3339	3281	6748	2479	5648	9824	12913	2842	3065	2654	1420	2746	2805	1219	5826	1804	5925	2681	2620	2065	1103	809	12095	2177	12678
Primary somatosensory area, nose	785	2683	11067	15005	1245	1850	1553	2109	2495	3000	1971	3360	8386	4866	4506	5504	13843	2832	3863	891	1439	708	3456	1691	3232	635	3977	4584	1291	1886	1702	135	7375	2420	15811
Primary somatosensory area, trunk	2273	2058	1661	2749	2759	1661	569	377	445	900	524	749	2747	754	136	134	2272	126	676	1843	603	11	1403	2348	645	42	3637	1247	1455	672	646	488	865	1253	3984
Primary somatosensory area, upper limb	7431	6156	18213	22713	3409	11532	2100	2494	2599	2070	2102	4168	12525	6014	4418	3677	8423	2140	2750	3853	1558	230	5756	4459	4835	592	11581	2465	3959	2732	2638	621	4698	5161	17943
Primary visual area	49046	21756	88488	90643	57863	94130	12284	9482	6150	6906	19073	23592	48459	26227	7791	9209	30352	5416	21953	34070	19300	674	24711	44636	24125	3715	83324	17375	35822	28712	29367	9420	28224	40870	98084
Principal sensory nucleus of the trigeminal	845	1093	3672	5465	2610	2124	974	894	912	2741	1969	2421	6862	2886	3166	4256	4562	681	1768	2414	2863	1647	1687	4032	2980	461	0	2573	1967	4395	1393	1619	4921	2621	5522
Pyramus (VIII)	887	406	767	3867	107	162	72	209	292	170	146	349	587	189	180	209	1422	443	62	194	34	52	280	1126	453	187	0	1523	461	133	155	24	278	117	789
Red nucleus	2118	762	5846	7106	3103	2963	1606	1612	1161	820	2681	2928	4390	3343	1430	1808	5972	1442	2096	2204	1195	864	2738	680	2966	222	0	5958	1305	2147	1840	1262	2271	1563	5615
Reticular nucleus of the thalamus	1843	1257	5644	6874	995	2186	530	1222	803	1133	1275	2033	5699	1884	1884	2793	7698	1172	1939	1173	672	345	1330	1878	2039	228	609	7320	1579	1618	636	594	2197	1254	4209
Retrochiasmatic area	96	224	488	259	225	283	167	87	85	102	66	201	297	129	51	77	800	132	87	202	94	107	96	325	102	207	0	0	108	87	226	48	418	105	261
Retrosplenial area, dorsal part	8712	5725	20064	23941	5907	17172	981	1838	1615	1064	1861	1849	9323	8545	572	377	9742	1912	3063	4310	1425	21	3671	5726	2257	443	6771	3934	7513	2030	1934	726	6308	5296	25118
Retrosplenial area, lateral agranular part	2375	2320	5621	7155	2441	5229	354	623	566	241	576	1017	3046	2321	127	61	1443	702	578	1983	750	2	1386	2258	1057	91	7724	2568	2516	599	845	507	1640	2117	5419
Retrosplenial area, ventral part	6572	7257	18196	23121	3596	25055	998	2227	1659	1143	916	1535	9446	7968	801	454	16894	2514	6274	3610	4137	29	3220	2247	1330	86	1923	5645	8939	1476	902	157	5929	4063	26880
Rhomboid nucleus	55	44	162	336	21	119	48	45	47	92	57	147	509	82	314	340	506	68	186	75	29	14	27	210	129	1	0	0	22	61	69	8	208	118	507
Rostral linear nucleus raphe	64	7	38	36	33	31	24	1	8	3	2	2	53	25	8	4	43	23	0	18	28	20	9	16	25	2	0	0	17	4	13	5	0	18	27
Secondary motor area	5750	8972	13503	17473	2570	14769	2476	5078	4189	1101	1652	4319	13939	3909	6910	7083	14977	2396	2577	4973	2068	857	3819	5305	6158	905	4184	2430	3756	1310	2717	896	5821	4153	15109
Septofimbrial nucleus	350	132	351	789	340	650	88	89	125	60	77	36	295	129	40	90	224	326	30	122	51	21	106	49	162	28	0	172	120	88	82	97	188	132	280
Septohippocampal nucleus	38	28	9	17	33	0	1	2	15	0	19	2	9	6	1	3	40	2	1	38	13	1	7	5	12	3	0	2	0	11	2	25	13	8	6
Simple lobule	1263	2424	2865	4494	1810	2015	780	1799	3235	1315	1457	1735	2760	800	1537	3659	6999	2248	1254	1241	1011	3322	1233	722	1442	585	5183	1432	1682	1285	623	395	2314	1178	1954
Somatosensory areas	12931	7580	25055	33623	11210	20904	3181	2901	2323	3787	4288	6510	15230	8810	5094	4357	14194	3069	6035	10383	8042	442	9453	12811	7680	920	20083	5852	3537	5299	6713	2369	9343	8250	27842
Spinal nucleus of the trigeminal, caudal part	1622	2213	6612	8134	3623	3877	487	1016	845	1668	3347	2138	7686	1119	1373	1687	6735	1800	839	3437	516	209	1166	3974	1665	385	0	1475	7412	5799	1404	2098	4791	2778	6480
Striatum	3608	2351	8797	10268	3403	5097	1340	2019	1674	1510	1380	1787	5652	2159	2292	2797	6168	2479	1448	2259	1656	394	1766	3097	2151	445	709	4861	1922	1690	1963	1599	3431	3044	5702
Striatum-like amygdalar nuclei	188	193	884	994	229	278	150	186	138	399	75	139	672	210	381	313	906	327	185	120	177	25	158	490	142	53	10	564	69	146	206	116	362	227	677
Subceruleus nucleus	31	44	48	36	60	39	25	19	29	34	9	17	168	60	26	55	69	24	5	49	50	59	21	67	46	10	0	14	82	13	22	71	45	23	133
Subfornical organ	7	30	140	14	60	17	54	3	21	9	8	48	24	0	8	20	40	17	16	0	3	23	38	3	39	15	0	0	6	0	0	2	21	11	9
Subgeniculate nucleus	79	15	178	107	67	149	66	37	8	12	58	76	61	29	45	84	58	17	26	98	56	18	87	11	71	5	0	286	68	59	11	49	50	23	83
Subiculum	6231	3552	13848	24032	4211	7034	2498	2611	2532	3992	3037	3553	14145	4857	3786	9560	28907	5697	4749	4333	4050	2073	4044	6611	3895	756	8272	7935	3305	4031	3775	1450	8588	7448	16325
Sublaterodorsal nucleus	95	137	137	165	106	152	49	74	101	48	90	190	447	197	68	108	279	57	56	101	115	151	75	58	113	47	0	106	108	54	42	177	93	78	404
Submedial nucleus of the thalamus	59	167	645	1088	62	212	29	137	146	304	422	476	905	203	1038	736	1516	193	569	288	29	16	218	372	291	12	0	0	66	126	164	24	445	309	1238
Subparafascicular nucleus	1225	430	1264	2718	945	1687	572	472	217	186	351	524	844	665	122	139	750	483	150	1185	381	90	669	258	567	88	0	3145	748	473	339	433	760	394	1421
Subparaventricular zone	296	154	482	603	115	384	92	133	78	151	56	111	344	65	46	96	148	259	119	197	50	29	115	275	95	64	0	0	212	120	545	41	215	243	365
Substantia innominata	1207	1385	7151	8278	750	2858	774	1803	1737	1488	715	1946	5360	1696	5107	5092	6656	1879	978	859	768	297	1351	2279	1685	381	19	3541	1090	821	669	375	4419	2190	6154
Substantia nigra, compact part	160	119	938	1115	328	608	125	178	184	139	409	448	983	294	298	309	1406	247	242	269	217	110	348	145	317	32	0	1981	344	258	134	59	286	230	1053
Substantia nigra, reticular part	769	756	6975	5796	1499	3458	456	1109	1334	1355	2335	4085	6889	2848	4208	4263	10565	1563	2433	1483	1531	603	1958	638	2202	66	0	19243	1592	2285	792	238	3716	2353	6934
Subthalamic nucleus	138	106	622	1199	512	470	179	162	125	979	282	779	2843	418	661	548	1659	145	279	394	220	27	682	1016	319	24	0	501	99	179	259	189	1730	386	1634
Superior central nucleus raphe	925	736	1505	1020	981	1200	205	190	575	742	268	386	1730	478	651	1021	1458	1004	19	451	272	264	293	967	461	119	0	0	511	444	374	294	255	715	1301
Superior colliculus, motor related	8873	7665	17236	38298	6077	20111	2650	3440	3807	5959	6253	3779	13729	8641	1938	4136	20834	8814	7973	3073	3806	1534	3032	5192	5388	1839	1089	9106	11995	4144	3717	1490	8662	5284	20316
Superior colliculus, sensory related	9151	5584	13934	18736	6035	15276	1644	1531	1996	1456	3158	2321	10044	5363	1000	1328	8163	2495	4556	3469	2105	179	1901	4911	3344	339	979	1744	8794	2875	1312	843	5178	3080	15851
Superior olivary complex	109	352	448	705	231	487	75	204	271	1539	180	355	1050	221	903	1120	1727	163	235	270	430	92	381	266	334	153	0	100	130	500	213	205	572	831	1279
Supplemental somatosensory area	2353	4024	7545	12400	1871	8543	1163	3374	3298	3695	2483	2035	7530	3047	2593	5183	18825	5856	5004	4628	1981	517	2510	2059	3489	1825	12393	8023	5101	2761	2567	972	10656	3076	18035
Suprachiasmatic nucleus	181	93	604	61	118	300	69	44	30	48	22	41	110	40	24	28	27	80	21	65	23	28	40	289	39	39	0	0	229	50	44	13	48	48	141
Suprageniculate nucleus	8	14	34	92	9	41	33	16	11	9	16	26	24	16	33	57	81	37	36	2	24	14	46	4	35	15	26	101	18	19	9	5	167	27	167
Supramammillary nucleus	252	189	599	543	441	671	160	185	165	154	69	149	538	113	248	209	449	279	95	195	290	35	275	432	146	84	0	0	257	161	218	84	250	301	588
Supraoptic nucleus	42	60	57	88	45	80	13	21	32	35	7	11	85	19	13	10	154	82	14	16	21	7	14	73	15	8	0	0	24	22	22	10	67	43	112
Taenia tecta	1801	1257	4135	7205	1350	3753	237	886	773	451	431	1670	5774	896	1900	3107	3163	853	583	1255	975	776	596	1231	1025	230	0	752	1149	703	684	541	1343	2480	3757
Temporal association areas	4660	2795	7982	12188	4281	8686	1281	2656	1716	1231	2611	2813	3448	3384	825	2380	8237	4197	1333	8691	3647	603	3872	3647	3636	1881	6611	3897	2328	1935	2905	2379	6530	5024	10665
Thalamus	11696	5778	13963	26953	6450	12228	5295	4364	2990	5442	8472	9645	15914	7369	6281	7477	20650	4898	6220	8933	3570	879	7527	5795	8355	1420	821	18242	6283	6815	4132	4214	13340	6973	20865
Thalamus, sensory-motor cortex related	41	36	21	58	55	60	17	13	32	7	12	23	60	36	16	12	44	26	10	16	20	1	14	21	10	1	0	0	22	31	9	21	50	27	65
Triangular nucleus of septum	223	72	109	275	160	266	88	63	90	30	53	13	99	46	24	31	121	185	12	35	17	15	38	31	65	17	0	91	50	49	14	48	114	69	126
Trochlear nucleus	9	5	8	76	0	5	1	7	9	6	10	5	21	13	0	0	68	7	1	2	3	1	5	0	6	3	0	5	1	2	5	1	10	10	43
Tuberal nucleus	366	337	668	809	544	1087	128	203	216	563	113	367	255	295	165	163	1198	459	207	382	253	33	130	579	289	264	0	108	131	145	285	147	616	296	803
Tuberomammillary nucleus	39	39	70	121	26	85	43	21	22	29	20	16	65	28	22	19	49	45	18	19	34	9	40	36	24	6	0	0	28	26	4	4	35	34	38
Uvula (IX)	4642	1024	5852	4918	937	1578	754	626	1269	299	455	2793	5389	902	2405	2603	4493	1299	573	1134	420	611	761	4845	2132	249	0	1984	554	662	428	224	448	444	4166
Vascular organ of the lamina terminalis	34	6	113	78	46	65	136	13	4	1	1	5	9	5	9	6	2	20	0	13	1	4	0	15	7	2	0	0	12	17	0	1	11	28	67
Ventral anterior-lateral complex of the thalamus	4176	1471	7395	11876	953	4764	936	1105	756	1646	4093	5162	6624	3598	3229	4399	11088	645	2945	2305	899	205	2145	1080	3629	212	0	6612	2999	3821	1921	1683	2653	3193	5989
Ventral auditory area	2986	2327	5364	9510	3955	3938	689	1953	1552	1481	1780	1829	2768	2750	908	2392	8144	3143	1956	7869	3317	332	2164	2672	2252	1738	4002	1431	1265	1364	3219	1698	5460	3316	11423
Ventral cochlear nucleus	800	808	5010	4732	2676	3356	2421	639	250	1516	1605	3428	5940	2960	5554	7069	7311	128	2366	1927	3397	1395	1363	5930	4306	308	0	1252	1209	7633	1421	1650	4804	4598	7964
Ventral medial nucleus of the thalamus	1158	933	5190	7645	1097	2669	311	977	713	2800	2702	3713	5906	2423	4024	3933	6854	905	2886	2145	798	123	2890	2758	2916	130	0	4215	1492	1724	2073	711	2821	3090	6183
Ventral part of the lateral geniculate complex	2631	859	1883	2086	1576	3017	1650	722	332	228	1291	1447	1785	922	697	920	961	928	505	1606	1277	241	1488	1224	1670	471	896	1669	1038	819	923	1259	2349	765	2350
Ventral posterior complex of the thalamus	12276	3849	10737	21050	6823	7120	5240	3085	1381	4905	12681	11468	17889	8247	5994	7343	25214	1106	8432	10583	3056	282	7080	3782	10177	1412	3	12878	6033	9952	5087	6778	13597	5269	18141
Ventral posterolateral nucleus of the thalamus	2515	835	4375	7045	1523	2153	1095	1226	515	936	2975	2678	3638	1721	2162	2767	7536	408	2469	2913	753	113	2172	950	2540	145	0	5284	1807	3266	1395	1983	1980	1116	3682
Ventral premammillary nucleus	41	94	26	20	51	112	64	27	41	22	23	13	105	16	23	19	40	40	26	34	61	27	13	55	39	19	0	0	22	5	9	5	40	52	172
Ventral tegmental area	900	581	2284	2652	1202	1617	308	569	597	546	425	571	2081	844	727	784	2156	1080	474	733	606	141	467	1197	443	143	0	1437	974	580	509	395	1400	1094	2249
Ventral tegmental nucleus	69	35	223	175	84	59	12	24	41	12	30	55	219	10	44	54	138	48	5	43	15	12	17	35	18	7	0	0	24	20	9	14	22	24	197
Ventrolateral preoptic nucleus	27	20	53	44	10	63	24	6	8	15	10	54	26	23	41	43	98	18	1	83	10	22	7	4	40	0	0	0	36	9	4	8	13	14	39
Ventromedial hypothalamic nucleus	181	499	295	646	421	439	139	131	182	428	147	121	264	226	150	180	439	377	223	238	201	57	246	305	153	372	0	0	203	150	369	79	608	289	597
Vestibular nuclei	6603	2900	9837	15164	6229	4379	3442	3476	3913	1619	7791	8434	9656	5987	7434	11968	14454	3239	5502	3693	3767	3356	4486	2959	5543	1215	0	8588	7439	5289	3071	2356	5701	5597	13202
Visceral area	2410	1540	5389	1781	2302	6001	633	2193	781	143	1091	986	1211	605	254	874	3263	1870	353	2146	562	680	1676	274	1145	199	5586	9340	3675	2459	484	985	1988	1174	1806
Zona incerta	4905	1641	9268	10788	4475	7515	2071	2000	1075	2453	2840	3933	8005	3282	1936	2439	6317	1845	2162	4352	2490	654	4650	3944	3032	229	0	9107	3613	2561	1851	2868	3349	2341	8309
anterior commissure, olfactory limb	605	420	1734	2202	365	1101	159	394	332	64	108	382	1496	265	404	730	976	222	92	366	573	101	527	372	333	17	0	1465	297	230	145	45	726	616	1161
arbor vitae	6372	3402	6917	17368	3127	4775	3583	4454	3857	972	3463	6900	7390	2730	3191	6885	10141	2429	2511	3364	2482	2989	4358	2367	5981	1499	8785	15431	2445	2819	1999	429	3302	2214	6343
background	178982	59351	270896	197306	188298	206400	117308	60315	63397	59170	32668	78181	138570	59520	81369	89098	114142	103380	29130	63462	35451	25238	64691	83796	60536	30113	45095	63879	174221	64586	44265	47755	63871	55771	172317
cerebrum related	4929	3819	10096	14294	4782	8886	3919	2002	2504	3898	1738	4005	8211	2351	3509	4396	10287	4628	2950	2071	1528	752	1855	4462	1895	773	5339	4693	3559	1863	1572	998	4017	2465	7317
corpus callosum	9709	7467	21026	23784	5934	12797	3791	3934	4914	4152	3216	4701	11582	4403	3385	4982	16684	6802	5176	4846	3863	1281	3482	6289	3658	1462	22300	5531	5291	3356	3065	1550	5828	3495	12567
corticospinal tract	6519	2716	8383	11875	2910	5201	2406	1966	1887	2315	1740	3116	5727	2171	2704	3045	10420	2996	2113	2211	1415	323	2717	2091	2014	524	973	16179	4657	2143	1793	1167	2707	2423	5094
cuneate fascicle	97	13	95	140	50	47	9	4	16	8	9	43	55	20	69	74	97	13	12	18	0	8	12	54	21	5	0	19	85	30	22	9	42	35	118
facial nerve	45	86	93	60	79	117	40	49	57	25	36	84	167	54	22	67	98	46	75	51	58	69	37	55	60	45	0	25	121	174	15	60	121	51	157
fiber tracts	7009	3161	12675	15569	5434	7938	5522	2604	2402	2663	2826	5729	7968	3981	3771	5071	9330	3427	3396	3623	3101	1204	3609	4181	3346	1153	8107	8102	4835	2946	2871	1692	4736	2710	7808
gracile fascicle	3	5	30	11	3	0	1	1	2	4	0	4	5	6	0	9	19	0	0	0	0	0	0	54	0	0	0	0	9	5	2	0	1	9	5
inferior cerebellar peduncle	1114	537	2208	1548	814	1348	398	398	489	283	382	353	610	491	346	491	1573	320	346	267	406	186	477	394	381	187	1	3031	1215	417	276	232	710	822	1310
lateral olfactory tract, general	2810	449	5305	3889	1911	2638	1380	588	331	410	302	1075	3245	877	1334	1436	2157	151	192	640	252	379	716	1344	1176	227	46	1586	2122	1885	669	157	1573	2110	2984
medial forebrain bundle system	1111	664	2418	3849	1265	1917	527	465	511	553	757	854	2118	839	754	683	1550	972	567	727	459	235	637	1213	670	430	0	1180	991	640	631	485	1152	785	2167
medial lemniscus	1194	506	1911	1752	963	1138	412	404	361	747	438	551	1515	810	462	719	1903	658	413	816	538	187	648	910	669	108	0	2438	1225	511	271	613	573	554	2336
medial longitudinal fascicle	2129	689	1376	2558	731	428	279	538	801	875	159	610	1409	574	733	891	1194	717	44	669	481	98	440	430	456	288	0	362	713	796	410	382	186	559	1675
midbrain tract of the trigeminal nerve	12	21	34	61	17	28	4	12	20	14	24	14	44	53	4	17	23	8	5	19	31	21	4	31	17	6	0	10	14	5	4	36	5	16	26
middle cerebellar peduncle	1171	665	3116	1783	1767	1631	825	323	398	1436	704	395	2232	772	651	1012	4756	544	679	784	663	579	701	1231	670	172	172	7146	1567	575	510	283	532	430	1215
motor root of the trigeminal nerve	68	71	164	135	90	94	54	6	31	114	29	112	130	98	86	151	168	55	81	93	24	25	44	92	94	15	0	496	108	31	21	20	25	26	101
olfactory nerve layer of main olfactory bulb	1795	11	1257	4422	642	1763	573	114	0	130	0	379	1757	1	424	559	568	93	0	0	0	207	536	41	86	0	6	259	2046	431	369	0	668	671	1292
optic chiasm	302	108	1050	224	295	460	373	99	90	166	55	187	52	131	188	231	190	101	71	216	122	16	147	77	167	84	0	0	1135	138	0	70	113	54	193
optic nerve	10	16	3	38	41	52	20	7	12	3	11	51	1	67	68	45	0	0	2	151	100	2	5	0	54	0	0	0	2	61	12	0	2	1	130
optic tract	1522	747	1794	2304	689	1999	1138	301	353	951	467	994	1405	405	907	1037	2712	868	400	368	352	155	404	748	631	296	148	1083	895	634	303	281	554	183	758
posterior commissure	99	40	92	58	45	85	41	24	28	11	42	23	47	34	8	22	18	58	7	54	37	9	59	19	33	33	0	20	66	46	39	10	95	48	79
posteromedial visual area	4533	2429	10707	10830	4451	7530	612	643	497	92	803	2986	4283	2365	93	69	764	718	1041	2390	1658	7	1804	3016	1730	102	12164	4448	4248	679	1378	799	1132	2958	6428
root	1	0	6	3	1	3	1	3	0	1	0	2	6	2	2	2	4	1	0	3	0	2	0	3	4	0	1	2	4	0	0	1	2	0	4
rubrospinal tract	455	254	934	723	453	605	153	163	323	533	333	332	770	306	476	608	1569	384	229	398	330	119	255	280	259	112	0	1208	428	443	202	168	452	472	939
solitary tract	14	12	31	45	18	20	16	5	13	14	52	16	29	9	18	28	49	7	10	9	10	1	5	8	6	0	0	0	44	33	13	6	83	31	53
spinal tract of the trigeminal nerve	2025	947	3054	2259	1220	1835	787	474	1038	1057	697	748	2160	1003	1093	1380	4745	568	496	734	793	475	540	937	629	248	0	2404	2464	1195	385	422	1362	773	1436
superior cerebelar peduncles	927	394	894	1601	392	729	336	505	379	102	284	861	1008	472	328	697	535	253	138	586	306	533	590	199	650	115	0	1808	121	250	283	175	218	223	756
tectospinal pathway	299	232	541	501	292	372	169	102	190	200	180	219	537	165	216	345	660	232	91	224	141	121	189	292	280	55	0	0	203	248	119	80	225	199	418
thalamus related	267	143	770	1087	112	210	70	151	71	118	258	251	623	110	185	292	1641	88	225	171	71	33	132	65	204	21	45	1001	200	256	62	116	173	72	448
trochlear nerve	10	6	8	36	9	5	7	5	8	4	12	4	17	2	3	0	6	1	6	5	13	1	8	11	8	9	0	15	11	4	7	12	6	5	12
ventricular systems	15786	5859	28958	27350	14529	15615	10340	3859	4108	4913	4855	13824	15542	6678	7774	12362	14069	5647	6240	7691	7132	4317	5603	8720	5999	2409	6099	8910	12352	5761	4390	3272	9301	5515	14692
vestibulocochlear nerve	2191	1296	5475	6062	1683	3612	1156	1034	1214	2276	1235	1804	4592	1875	2055	3362	8462	1274	927	1595	977	774	1315	2147	1674	613	666	7007	2095	1822	1019	956	2263	1841	3811
vomeronasal nerve	0	0	0	0	0	6	0	0	0	0	0	0	0	0	1	0	4	0	0	0	0	0	0	0	0	0	0	0	0	0	0	0	0	0	0
