# Supplementary material for: Neural basis of adolescent THC-induced potentiation of opioid responses later in life
Source: Neuropsychopharmacology. 2024 Dec 10;50(5):818–27. doi: 10.1038/s41386-024-02033-8 (PMC11914220; doi:10.1038/s41386-024-02033-8)
Supplement: Supplementary file 4 — Supplemental Table 3 [file 41386_2024_2033_MOESM4_ESM.xlsx]

## Sheet: Sheet1
	brightnessThreshold	shapeMin	shapeMax	hMax	OriginalResolution	condition	total
THC-Cohort3_Veh-2588R_638cfos_LH	200	10	9000000	5	(1.83057, 1.83057, 3)	vehicle	865034
THC-Cohort3_Veh-2590R_638cfos_LH	10	450	9000000	40	(1.83057, 1.83057, 3)	vehicle	517029
THC-Cohort3_THC-2515R_638cfos_LH	120	10	9000000	10	(1.83057, 1.83057, 3)	THC	1749645
THC-Cohort3_THC-2518R_638cfos_LH	160	10	9000000	5	(1.83057, 1.83057, 3)	THC	2093132
THC-Cohort3_THC-2510R_638cfos_LH	155	10	9000000	5	(1.83057, 1.83057, 3)	THC	1339532
THC-Cohort3_THC-2508R_638cfos_LH	160	10	9000000	45	(1.83057, 1.83057, 3)	THC	1258625
THC-Cohort3_Veh-2579R_638cfos_LH	75	100	9000000	20	(1.66, 1.66, 3)	vehicle	402414
THC-Cohort3_Veh-2577R_638cfos_VG	13	270	9000000	35	(3.66, 3.66, 3)	vehicle	378144
THC-Cohort3_Veh-2578R_638cfos_VG	8	425	9000000	10	(3.66, 3.66, 3)	vehicle	356189
THC-Cohort2_THC-2R_638cfos_VG	35	100	9000000	9	(3.66, 3.66, 3)	THC	378666
THC-Cohort3_THC-2513R_638cfos_VG	80	10	9000000	5	(3.65999, 3.66113, 3)	THC	385968
THC-Cohort3_THC-2512R_638cfos_VG	55	20	9000000	40	(3.66114, 3.66114, 3)	THC	570079
THC-Cohort3_THC-2517R_638cfos_VG	55	15	9000000	7	(3.66009, 3.66115, 3)	THC	1313908
THC-Cohort3_THC-2519R_638cfos_VG	70	10	9000000	5	(3.66115, 3.66115, 3)	THC	524653
THC-Cohort2_THC-4R_638cfos_VG	60	12	9000000	5	(3.66, 3.66, 3)	THC	530400
THC-Cohort2_THC-3R_638cfos_VG	60	15	9000000	5	(3.66, 3.66, 3)	THC	717609
THC-Cohort2_THC-1R_638cfos_VG	53	10	9000000	5	(3.66, 3.66, 3)	THC	1585655
THC_Cohort4_Veh-19R_638cfos_VG	20	300	9000000	5	(3.66, 3.66, 3)	vehicle	490636
THC-Cohort3_Veh-2576R_638cfos_VG	35	63	9000000	5	(3.66, 3.66, 3)	vehicle	389138
THC-Cohort3_Veh-2589R_638cfos_VG	55	10	9000000	10	(3.66, 3.66, 3)	vehicle	552098
THC-Cohort3_Veh-2591R_638cfos_VG	33	57	9000000	10	(3.66, 3.66, 3)	vehicle	377359
THC-Cohort3_Veh-2592R_638fos_VG	38	120	9000000	5	(3.66, 3.66, 3)	vehicle	168626
THC-Cohort3_THC-2506R_638cfos_VG	50	20	9000000	5	(3.66, 3.66, 3)	THC	491189
THC-Cohort3_THC-2509R_638cfos_LH	190	20	9000000	5	(1.83057, 1.83057, 3)	THC	619100
THC-Cohort3_THC-2516R_638cfos_VG	60	15	9000000	5	(3.66, 3.66, 3)	THC	549849
THC-Cohort3_THC-2584R_638fos_VG	105	10	9000000	5	(3.66, 3.66, 3)	THC	151357
THC-Cohort3_Veh-2586R_638cfos_SS	190	20	9000000	5	(1.8057, 1.8057, 3)	vehicle	596390
THC-Cohort3_THC-2507R_638cfos_VG	72	5	9000000	20	(3.66, 3.66, 3)	THC	855399
THC-Cohort3_THC-2511R_638cfos_SS	160	10	9000000	5	(1.83058, 1.83058, 3)	THC	716804
THC-Cohort3_THC-2580R_638cfos_VG	80	5	9000000	20	(3.66, 3.66, 3)	THC	913956
THC-Cohort3_Veh-2587R_638cfos_VG	12	400	9000000	25	(3.66, 3.66, 3)	vehicle	366245
THC-Cohort3_Veh-2585R_638fos_VG	90	15	9000000	5	(3.66, 3.66, 3)	vehicle	256637
THC-Cohort3_THC-2582R_638fos_VG	55	20	9000000	7	(3.66, 3.66, 3)	THC	773770
THC-Cohort3_THC-2581R_638fos_VG	55	20	9000000	5	(3.66, 3.66, 3)	THC	596006
THC-Cohort3_THC_2583R_638fos_VG	60	10	9000000	5	(3.66, 3.66, 3)	THC	1656070
