# Supplementary material for: Neural basis of adolescent THC-induced potentiation of opioid responses later in life
Source: Neuropsychopharmacology. 2024 Dec 10;50(5):818–27. doi: 10.1038/s41386-024-02033-8 (PMC11914220; doi:10.1038/s41386-024-02033-8)
Supplement: Supplementary file 5 — Supplemental Table 4 [file 41386_2024_2033_MOESM5_ESM.xlsx]

## Sheet: ClearMap Count Accuracy
	Clearmap Counts					Manual Counts							ClearMap Counts/Manual Counts Ratio
Sample	GPe	PL	Hippocampus	MTN		GPe	PL	Hippocampus	MTN			GPe	PL	Hippocampus	MTN
2590R	63	75	70	59		166	81	81	62			0.379518	0.925926	0.864198	0.951613
2510R	0	46	47	120		1	44	59	83			0	1.04545	0.79661	1.44578
2508R	0	43	212	68		3	54	196	55			0	0.796296	1.08163	1.23636
2579R	5	10	26	153		72	11	22	58			0.0694444	0.909091	1.18182	2.63793
2577R	99	171	79	94		117	208	74	88			0.846154	0.822115	1.06757	1.06818
2578R	154	105	104	139		168	33	98	150			0.916667	3.18182	1.06122	0.926667
4R	23	38	43	15		24	33	17	35			0.958333	1.15152	2.52941	0.428571
3R	68	22	48	20		40	20	44	19			1.7	1.1	1.09091	1.05263
1R	112	147	81	11		76	128	45	14			1.47368	1.14844	1.8	0.785714
19R	53	16	210	167		40	127	219	137			1.325	0.125984	0.958904	1.21898
2576R	114	34	26	11		125	34	26	15			0.912	1	1	0.733333
2591R	90	53	17	38		73	45	34	33			1.23288	1.17778	0.5	1.15152
2592R	3	0	36	16		3	0	33	16			1	1	1.09091	1
2506R	21	51	18	120		26	57	19	64			0.807692	0.894737	0.947368	1.875
2509R	14	9	49	89		15	12	42	63			0.933333	0.75	1.16667	1.4127
2516R	145	108	69	117		155	56	66	114			0.935484	1.92857	1.04545	1.02632
											Average	0.843137	1.12236	1.13642	1.18446

## Sheet: Full Linear Regression Results
GPe Linear Regression
slope		1.05411	0
s.e. for slope		0.109478	#N/A
r^2	s.e. for y estimate	0.860735	34.7553
F statistic	df	92.7082	15
ssreg	ssresid	111985	18119
PL Linear Regression
slope		0.920161	0
s.e. for slope		0.125219	#N/A
r^2	s.e. for y estimate	0.782606	37.9931
F statistic	df	53.9993	15
ssreg	ssresid	77946.8	21652.2
Hippocampus Linear Regression
slope		0.956322	0
s.e. for slope		0.0370595	#N/A
r^2	s.e. for y estimate	0.97797	13.5836
F statistic	df	665.9	15
ssreg	ssresid	122867	2767.7
MTN Linear Regression
slope		0.765578	0
s.e. for slope		0.0622847	#N/A
r^2	s.e. for y estimate	0.909684	23.3495
F statistic	df	151.083	15
ssreg	ssresid	82370	8177.96
